1 [The neural dynamics of familiar face recognition](#)

2 Géza Gergely Ambrus <sup>a, \*</sup>, Daniel Kaiser <sup>b, \*</sup>, Radoslaw Martin Cichy <sup>b, c, d</sup>, Gyula Kovács <sup>a</sup>

3 <sup>a</sup> *Institute of Psychology, Friedrich Schiller University Jena, Jena, Germany*

4 <sup>b</sup> *Department of Education and Psychology, Freie Universität Berlin, Berlin, Germany*

5 <sup>c</sup> *Berlin School of Mind and Brain, Humboldt-Universität Berlin, Berlin, Germany*

6 <sup>d</sup> *Bernstein Center for Computational Neuroscience Berlin, Berlin, Germany*

7 *\* These authors contributed equally to the study*

8

9 **Abbreviated title:** Neural dynamics of face recognition

10

11 **Number of pages:** 31

12 **Number of figures:** 5

13 **Number of tables:** 0

14 **Words count Abstract:** 201

15 **Words count Introduction:** 573

16 **Word count Discussion:** 684

17

18 **Acknowledgements:** The authors would like to thank Lisa-Celine Süllwold and Bettina Kamchen

19 for their help in participant recruitment and data acquisition. This work was supported by grants

20 from the Deutsche Forschungsgemeinschaft (KO3918/5-1, KA4683-2/1, CI241-1/1).

21

22 **Conflicts of interest:** The authors declare no competing financial interests.

23

24 [Abstract](#)

25 In real-life situations, the appearance of a person's face can vary substantially across different  
26 encounters, making face recognition a challenging task for the visual system. Recent fMRI  
27 decoding studies have suggested that face recognition is supported by identity representations  
28 located in regions of the occipito-temporal cortex. Here, we used EEG to elucidate the temporal  
29 emergence of these representations. Human participants (both sexes) viewed a set of highly  
30 variable face images of four highly familiar celebrities (two male, two female), while performing  
31 an orthogonal task. Univariate analyses of event-related EEG responses revealed a pronounced  
32 differentiation between male and female faces, but not between identities of the same sex. Using  
33 multivariate representational similarity analysis, we observed a gradual emergence of face  
34 identity representations, with an increasing degree of invariance. Face identity information  
35 emerged rapidly, starting shortly after 100ms from stimulus onset. From 400ms after onset and  
36 predominantly in the right hemisphere, identity representations showed two invariance  
37 properties: (1) they equally discriminated identities of opposite sexes and of the same sex, and  
38 (2) they were tolerant to image-based variations. These invariant representations may be a crucial  
39 prerequisite for successful face recognition in everyday situations, where the appearance of a  
40 familiar person can vary drastically.

41

42

43 [Significance Statement](#)

44 Recognizing the face of a friend on the street is a task we effortlessly perform in our everyday  
45 lives. However, the necessary visual processing underlying familiar face recognition is highly  
46 complex. As the appearance of a given person varies drastically between encounters, for example  
47 across viewpoints or emotional expressions, the brain needs to extract identity information that  
48 is invariant to such changes. Using multivariate analyses of EEG data, we characterize how  
49 invariant representations of face identity emerge gradually over time. After 400ms of processing,  
50 cortical representations reliably differentiated two similar identities (e.g., two famous male  
51 actors), even across a set of highly variable images. These representations may support face  
52 recognition under challenging real-life conditions.

53 [Introduction](#)

54 Efficient face recognition is a key ability in human's everyday lives, and many studies have  
55 investigated its underlying neural mechanisms (Gobbini and Haxby, 2007; Duchaine and Yovel,  
56 2015). Recently, much progress has been made in spatially pinpointing the neural correlates of  
57 face recognition by advances in multivariate classification techniques for fMRI data (Anzellotti  
58 and Caramazza, 2014). These techniques have allowed researchers to decode face identity from  
59 different regions of the face processing network, such as from the fusiform face area (FFA; Gilaie-  
60 Dotan and Malach, 2007; Nestor et al., 2011; Goesaert and Op de Beeck, 2013; Verosky et al.,  
61 2013; Anzellotti et al., 2014; Axelrod and Yovel, 2015; Weibert et al., 2016), the anterior temporal  
62 lobe (ATL; Kriegeskorte et al., 2007; Nasr and Tootell, 2012; Anzellotti et al., 2014) or from a larger  
63 network extending from early visual areas towards the inferior frontal gyrus (Visconti Di Oleggio  
64 Castello et al., 2017).

65         The temporal emergence of face identity representations, however, remains relatively  
66 unexplored. Most of our knowledge on the temporal dynamics of face recognition stems from  
67 EEG and magnetoencephalography (MEG) studies employing traditional, univariate analyses on  
68 temporally confined ERP/MEP components. Across these studies, the components associated  
69 with face recognition vary substantially: Several reports have linked face recognition to the P100  
70 and N170 components (Debruille et al., 1998; Heisz et al., 2006; Caharel et al., 2009; Rousselet et  
71 al., 2009; Liu et al., 2013), others have stressed the role of the later N250 and N400 components  
72 (Bentin and Deouell, 2000; Schweinberger et al., 2002; Huddy et al., 2003; Tanaka et al., 2006;  
73 Curran and Hancock, 2007; Gosling and Eimer, 2011; Jin et al., 2012).

74

75           So far only three studies have used multivariate pattern analysis (MVPA) to evaluate the  
76 temporal dynamics of face identity processing (Nemrodov et al., 2016, 2018; Vida et al., 2017).  
77 All three investigated the temporal emergence of identity representations across changes in  
78 emotional expression, revealing that identity representations emerge relatively early within the  
79 first 200ms after stimulus onset.

80           However, these previous studies suffer from two critical shortcomings. First, they used  
81 unfamiliar faces, whose processing is assumed to be markedly different from the processing of  
82 familiar faces, as reflected both in behavioral performance (Johnston and Edmonds, 2009) and  
83 neural activations (Natu and O’Toole, 2011). Second, variability across images of the same identity  
84 was very limited, leaving it unclear how their results generalize to everyday face recognition  
85 where individual encounters with highly-variable, "ambient" face images give rise to drastic visual  
86 differences (Mike Burton, 2013; Young and Burton, 2017; Kramer et al., 2018).

87           In the current EEG study, we provide a temporal characterization of face identity  
88 processing, which eliminates both shortcomings: First, we used images of four celebrities, who  
89 were highly familiar to the participants (Fig. 1A). Second, for each identity, we used 10 “ambient”  
90 images (Jenkins et al., 2011), which varied substantially in a range of properties, such as  
91 viewpoint, lighting, and expression.

92           Using representational similarity analysis (RSA; Kriegeskorte and Kievit, 2013), we show  
93 that the earliest representations of facial identity emerge shortly after 100ms post-stimulus and  
94 most robustly in posterior electrodes. Later representations, emerging from 400ms onwards and  
95 in electrodes over right occipito-temporal cortex, contained identity information for faces of the  
96 same sex and were invariant to image-based properties. Our results suggest that familiar face  
97 recognition is supported by fine-grained neural representations in the face processing network,

- 98 where identity information over time becomes increasingly invariant to other visual and
- 99 conceptual properties of the face.

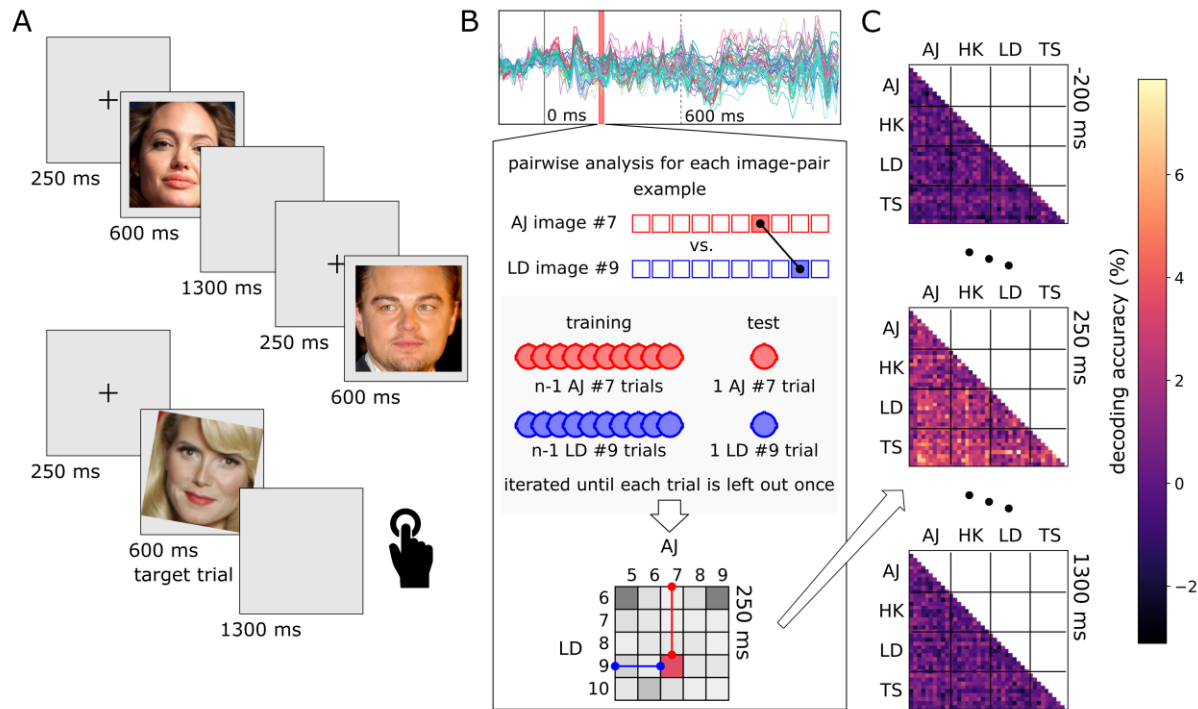

**Figure 1. Design and Analysis Approach.** A. Trial structure and stimulus examples. Stimuli were “ambient”, face-cropped images of four highly recognized celebrities (Angelina Jolie (AJ), Heidi Klum (HK), Leonardo DiCaprio (LD), Til Schweiger (TS))<sup>1</sup>. Each trial started with a fixation cross (250ms), followed by the stimulus image (600ms) and a blank screen (1300ms). Target trials containing a tilted stimulus (illustrated on the bottom) were included to ensure that participants maintained attention. B. The logic of the multivariate pattern analysis. Top: A representative ERP recording from one participant. EEGs were segmented between -200 to 1300ms relative to stimulus onset. Bottom: For each time point separately, linear classification analyses were performed for each combination of individual images, using a leave-one-trial-out scheme. This procedure resulted in a 40×40 matrix (i.e., 10 images for each of the 4 identities) of decoding accuracies at each time point. C. Representational dissimilarity matrices (RDMs) showing pairwise decoding accuracies at -200, 250 and 1300ms relative to stimulus onset.

<sup>1</sup> Image credits: File:Angelina Jolie at Davos crop.jpg. (2014, April 23). *Wikimedia Commons, the free media repository*. Retrieved 15:17, May 1, 2018 from [https://commons.wikimedia.org/w/index.php?title=File:Angelina\\_Jolie\\_at\\_Davos\\_crop.jpg&oldid=122076100](https://commons.wikimedia.org/w/index.php?title=File:Angelina_Jolie_at_Davos_crop.jpg&oldid=122076100). Creative Commons Attribution-Share Alike 3.0 Unported license. File:LeonardoDiCaprioNov08.jpg. (2018, January 20). *Wikimedia Commons, the free media repository*. Retrieved 15:18, May 1, 2018 from

100

101 [Methods](#)

102 [Participants](#)

103 Twenty-six healthy participants (6 male), with an average age of 25 years (SD = 5.0) took part in  
104 the study in exchange for partial course credits or monetary compensation. The experiment was  
105 conducted in accordance with the guidelines of the Declaration of Helsinki, and with the approval  
106 of the ethics committee of the University of Jena. Written informed consent was acquired from  
107 all participants.

108 [Stimuli](#)

109 The stimuli were ambient, color photographs two female (Angelina Jolie, AJ; Heidi Klum, HK) and  
110 two male (Leonardo DiCaprio, LD; Til Schweiger, TS) celebrities. We selected these celebrities  
111 based on a pilot survey where we collected familiarity ratings across a range of well-known  
112 celebrities in Germany. For each identity, ten images were selected from a pool of web-scraped  
113 photographs, pre-screened for quality. Stimulus images were cropped to a rectangle centered on  
114 the inner features of the face (see Fig. 1A). To ensure substantial variation across images depicting  
115 the same identity, we selected images that minimized the structural similarity index (SSIM; Wang  
116 et al., 2004) among images of the same identity, while maximizing it among images of identities  
117 of the same sex; this was achieved by using random combination sorting with 100,000 iterations  
118 per sex category. The resulting mean SSIM values were: LD: 0.387, TS: 0.378, LD vs TS: 0.355; AJ:  
119 0.379, HK: 0.371, AJ vs HK: 0.337. Stimuli were presented centrally on a uniform gray background



120 on a TFT display (1680 × 1050 pixel resolution, refresh rate 60 Hz). The experiment was written in  
121 Psychopy (Peirce, 2008).

## 122 Experimental procedure

123 A total of 1760 trials (1600 non-target and 160 target) were presented in 40 runs, each containing  
124 the ten images of the four identities once, in a pseudo-random order (with the constraint that the  
125 same identity was never repeated in two consecutive trials). Thus, photos of one identity were  
126 seen 400 times, so that a given image of a given identity was presented 40 times during the  
127 experiment. Each trial started with a fixation cross (250ms), followed by the stimulus image  
128 (600ms, subtending a visual angle of 4.4° in diameter) and finally a blank display (1300ms). Short  
129 breaks were provided after every 10 runs, but the run boundaries were not indicated otherwise.  
130 There were four target-trials in each run, where the image was rotated 10 degrees clockwise or  
131 anticlockwise. Participants were instructed to press the space bar when they saw a target image  
132 (the overall detection accuracy was at  $99.52 \pm 0.67\%$ ). These target trials served to ensure that  
133 the participants maintained their attention, and were not included in the analysis. An average  
134 experimental session lasted 81.5 ( $\pm 5.3$ ) minutes.

135 At the beginning of each experiment, prior to mounting the electrode caps, participants  
136 were presented images of the four identities and were asked to name them. All our participants  
137 were able to name all four celebrities correctly. The images of this initial familiarity-testing phase  
138 were not part of the later EEG experiment. After the EEG recording, participants were asked to  
139 rate their familiarity with the identities on a 7-point scale. Mean ratings were generally high (AJ:  
140 6.12, HK: 6.30, LD: 6.15, TS: 6.11) and not statistically different for the four identities  
141 ( $F[3,75] = 0.243, p = 0.866$ ).

## 142 EEG recording and preprocessing

143 The EEG was recorded in a dimly lit, electrically shielded, and sound-attenuated chamber. The  
144 distance between the eyes and the computer screen was set to 96 cm via a chin rest. The  
145 electroencephalogram (EEG) was recorded with a 512 Hz sampling rate (bandwidth: DC to 120  
146 Hz) using a 64-channel Biosemi Active II system. Electrooculogram (EOG) was recorded from the  
147 outer canthi of the eyes and from above and below the left eye.

148 The preprocessing pipeline was implemented in MNE-python (Gramfort et al., 2013,  
149 2014). EEG was notch-filtered at 50 Hz, band-pass filtered between 0.1 and 70 Hz, segmented  
150 from -200 to 1300ms relative to stimulus onset, and baseline corrected with respect to the first  
151 200ms. Artefact rejection was carried out using the “Autoreject” algorithm (Jas et al., 2017). The  
152 resulting data was downsampled to 100Hz to increase signal-to-noise ratio in the multivariate  
153 analyses (Grootswagers et al., 2017).

## 154 Event-related potentials

155 To test for the presence of identity-related information within the conventional ERPs we averaged  
156 data across repetitions for each facial identity, electrode and participant separately. Next, we  
157 created grand-averages of these data across six regions of interests, corresponding to the left and  
158 right anterior (Fp, AF, F, FC), central (FT, TP, C, T) and posterior occipito-temporal electrodes (PO,  
159 P, O, I). The central electrodes (Fpz, AFz, Fz, FCz, Cz, CPz, Pz, POz, Oz, Iz) were included in both the  
160 left and the right clusters; this was done to maintain sufficient electrode counts for the  
161 multivariate analyses (see below). For reasons of consistency, the same electrode clusters were  
162 used in both analyses. The posterior clusters included the electrodes typically yielding the largest  
163 face-sensitive N170 components (Rossion and Jacques, 2008). First, we tested for identity  
164 selectivity by using a one-way repeated measures ANOVA with identity (4) as a factor. Second,

165 we averaged the two female and two male face elicited ERPs and performed a paired t-test for  
166 testing sex-specific differences. Third, we tested if the ERPs differed for the two identities within  
167 the same sex by comparing the ERPs for the two female as well as for the two male identities with  
168 each other in t-tests.

### 169 [Representational Similarity Analysis](#)

170 To model the neural organization of face representations, we performed a representational  
171 similarity analysis (RSA; Kriegeskorte et al., 2008) on the EEG data. In this analysis (Fig. 1B/C), the  
172 neural dissimilarity between all pairs of face images (i.e., between all 40 individual images), was  
173 modeled as a function of different predictor matrices (see below).

174 *Neural dissimilarity.* Neural dissimilarity was extracted by performing a linear classification  
175 analysis, where pairwise decoding accuracies were used as a measure of representational  
176 dissimilarity. Classification analysis was carried out using the CoSMoMVPA toolbox (Oosterhof et  
177 al., 2016). Linear-discriminant-analysis (LDA) classifiers were trained and tested on response  
178 patterns across all 64 electrodes, separately for each time point across the epoch (downsampled  
179 to 100 Hz, i.e., with a 10ms resolution) and separately for each pair of images. Training and testing  
180 was done in a leave-one-out scheme (Fig. 1B): classifiers were trained on all but one trials for each  
181 of the two conditions, and tested on the left-out trials. This procedure was repeated until each  
182 trial was left out once, and classification accuracy was averaged across these repetitions. Pairwise  
183 classification time-courses were smoothed with a 30ms (i.e., 3 consecutive time points) averaging  
184 window (Kaiser et al., 2016). This classification analysis led to one representational dissimilarity  
185 matrix (RDM; 40×40 entries, with empty diagonal) for each time point (Fig. 1C).

186 *Modelling neural dissimilarity.* To model the neural dissimilarity, we created four  
187 categorical predictor RDMs. Each predictor RDM covered 40×40 elements, and contained zeros

188 where the entries represented comparisons of similar images (i.e., similar on the dimension of  
189 interest, see below) and ones, where the entries reflected comparisons of dissimilar images. To  
190 quantify correspondence between the predictor RDMs and the neural RDMs, we unfolded the  
191 lower off-diagonal elements of the matrices into two vectors (i.e., the diagonal of both matrices  
192 was discarded) and correlated the vectors using Spearman's correlation coefficients. These  
193 correlations were computed separately for each time point, leading to a time series of  
194 correlations that reflected the correspondence of the neural data and the predictor. Individual-  
195 participant correlations were Fisher-transformed.

196 *Modelling identity Information.* For assessing differences between the four identities, all  
197 comparisons within a given identity (e.g., two images of AJ) were marked as similar (0) and all  
198 comparisons between two identities (e.g., an image of AJ and an image of TS) were marked as  
199 dissimilar (1) (Fig. 3A).

200 *Modelling sex information.* For assessing differences between face sexes, all comparisons  
201 within the same sex (e.g., an image of AJ and an image of HK) were marked as similar (0), and all  
202 comparisons between the different sexes (e.g., an image of AJ and an image of TS) were marked  
203 as dissimilar (1). To avoid confounding sex information with identity information, all comparisons  
204 within the same identity (e.g., two different images of AJ) were excluded from this analysis (as  
205 including these comparisons would overestimate the effect of sex) (Fig. 3C).

206 *Modelling identity information between and within sexes.* To uncover interactions  
207 between sex and identity processing, we constructed identity predictor RDMs that only covered  
208 all comparisons across the sexes or within one sex. The between-sex RDM was generated from  
209 the identity predictor matrix by removing all comparisons of two different identities of the same  
210 sex (e.g., an image of AJ and an image of HK), leaving only comparisons within identity (0) and

211 between identities of the opposite sex (1). The within-sex RDM was generated from the identity  
212 predictor matrix by removing all comparisons of two identities of different sexes (e.g., an image  
213 of AJ and an image of TS), leaving only comparisons within identity (0) and between identities of  
214 the same sex (1) (Fig. 3E). Note that this within-sex analysis tests for identity representations in  
215 more thorough way: by removing between-sex comparisons, the more pronounced differences  
216 between faces of the opposite sex (due to face sex, and due to visual differences) are eliminated.

217 *Sensor-space RSA.* To track representational organization across electrode space, we  
218 additionally repeated the RSA across the six electrode clusters also used in the ERP analysis (see  
219 above). Including central electrodes (Fpz, AFz, Fz; FCz, Cz, CPz; Pz, POz, Oz, Iz) in both left- and  
220 right-hemispheric clusters yielded electrode counts of 9, 15, and 13, for the anterior, central, and  
221 posterior clusters, respectively. All technical details of the cluster-specific RSAs were identical to  
222 the analysis using all available electrodes.

223 *Controlling for image similarity.* To quantify similarity on the image level, we computed  
224 pixel similarities for all pairs of images. Each image (220×220 pixels in 3 color layers) was first  
225 unfolded into a vector; these vectors were then correlated for each pair of images. A pixel RDM  
226 was generated by using  $1 - \text{correlation}$  as the dissimilarity measure. As the pixel RDM explained  
227 some variance in the face identity RDM ( $R^2=.06$ ), neural identity representations could in principle  
228 partly reflect pixel similarities. Hence, we used a partial correlation approach (Cichy et al., 2017;  
229 Groen et al., 2018), where we repeated the key analyses while removing the pixel RDM by  
230 partialing it out. This analysis revealed representations of face identity that are invariant to pixel-  
231 based image similarities.

## 232 Statistical testing

233 To identify significant effects across time, we used a threshold-free cluster enhancement  
234 procedure (Smith and Nichols, 2009) with default parameters. Multiple-comparison correction  
235 across time was based on a sign-permutation test (with null distributions created from 10,000  
236 bootstrapping iterations) as implemented in CoSMoMvPA (Oosterhof et al., 2016). The resulting  
237 statistical maps were thresholded at  $Z > 1.64$  (i.e.,  $p < .05$ , one sided against zero).

238

## 239 Results

### 240 Event-related potentials reflect face sex, but not face identity

241 Following traditional EEG studies on face perception, we first performed a univariate ERP analysis  
242 across six electrode clusters (Fig. 2). ERPs were different for the four identities primarily in the  
243 bilateral posterior electrode clusters (main effect of identity in a four-way ANOVA, Fig. 2E/F,  
244 purple line) starting from 100ms for the left and 120ms for the right hemisphere (Fig. 2),  
245 remaining significant throughout the length of the epoch. The other electrode clusters showed  
246 weaker and less temporally persistent differences (A-D). The difference between identities  
247 however originated from the significantly different ERPs for female and male faces from 190ms  
248 (left) and 150ms (right), throughout the length of the epoch. By contrast, within-sex comparisons  
249 led to no significant results at any of the time-points over either of the electrode clusters. These  
250 results support prior studies showing that ERP signals more prominently reflect face sex than face  
251 identity (Mouchetant-Rostaing et al., 2000; Freeman et al., 2010). In the following we applied  
252 multivariate pattern analysis to further probe the emergence of identity information with higher  
253 sensitivity.

254

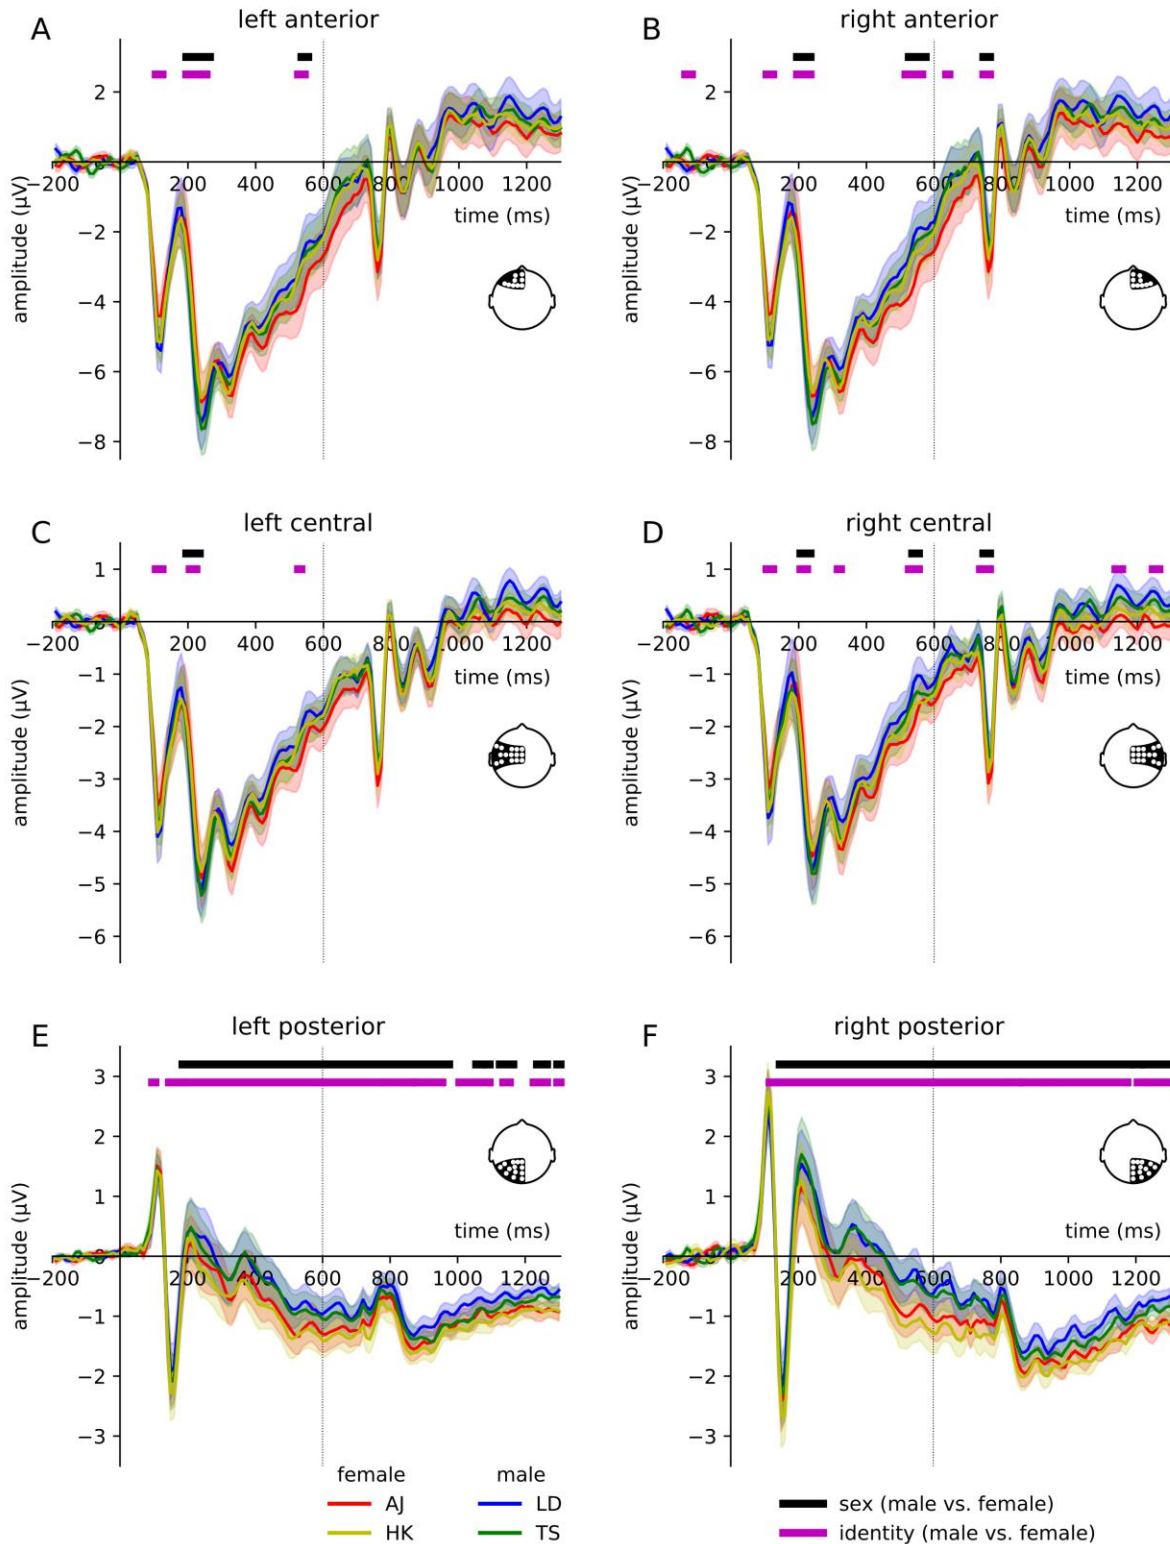

**Figure 2. ERP Results.** Grand-average ERPs were significantly differed across the four identities (purple significance markers), particularly in the posterior electrode clusters (E, F). This effect

was driven by a pronounced difference between male and female faces (black significance markers). Identities of the same sex were not discriminable from ERP responses in any of the clusters, suggesting that ERPs primarily reflect face sex, rather than face identity. Red, blue, yellow and green show the average ERPs for the four celebrities. Horizontal lines denote statistical significance ( $p < 0.05$ , FDR-corrected for multiple comparisons). Shaded ranges denote standard errors of the mean.

255

### 256 [Tracking the emergence of face identity representations](#)

257 To reveal identity information in the EEG signals, we generated an identity predictor RDM, which  
258 reflected the 40 images' dissimilarity in identity (Fig. 3A). We then correlated the neural RDM  
259 with this identity RDM separately at every time point. This analysis revealed significant  
260 correlations from 110ms onwards, peaking at around 410ms (peak  $t[25]=5.97$ ) and lasting across  
261 the whole epoch (Fig. 3B), suggesting rapidly emerging and long-lasting face identity information  
262 in the signal.

263 Our stimulus set contained faces of both sexes, and faces within the same sex share more  
264 visual and conceptual properties than faces of opposite sexes (O'Toole et al., 1998). To determine  
265 whether such sex differences could be retrieved from the EEG signals, we correlated the neural  
266 RDM with a sex predictor RDM separately at every time point (Fig. 3C). This sex predictor RDM  
267 only contained between-identity comparisons, so that this analysis reflected face sex  
268 independently of identity. We found significant sex information from 140ms to 680ms, peaking  
269 at 270ms (peak  $t[25]=4.39$ ) (Fig. 3D). This indicates that the early EEG signals also contain reliable  
270 differences between sexes, emerging at a similar time point as identity-specific information but  
271 decaying more rapidly.



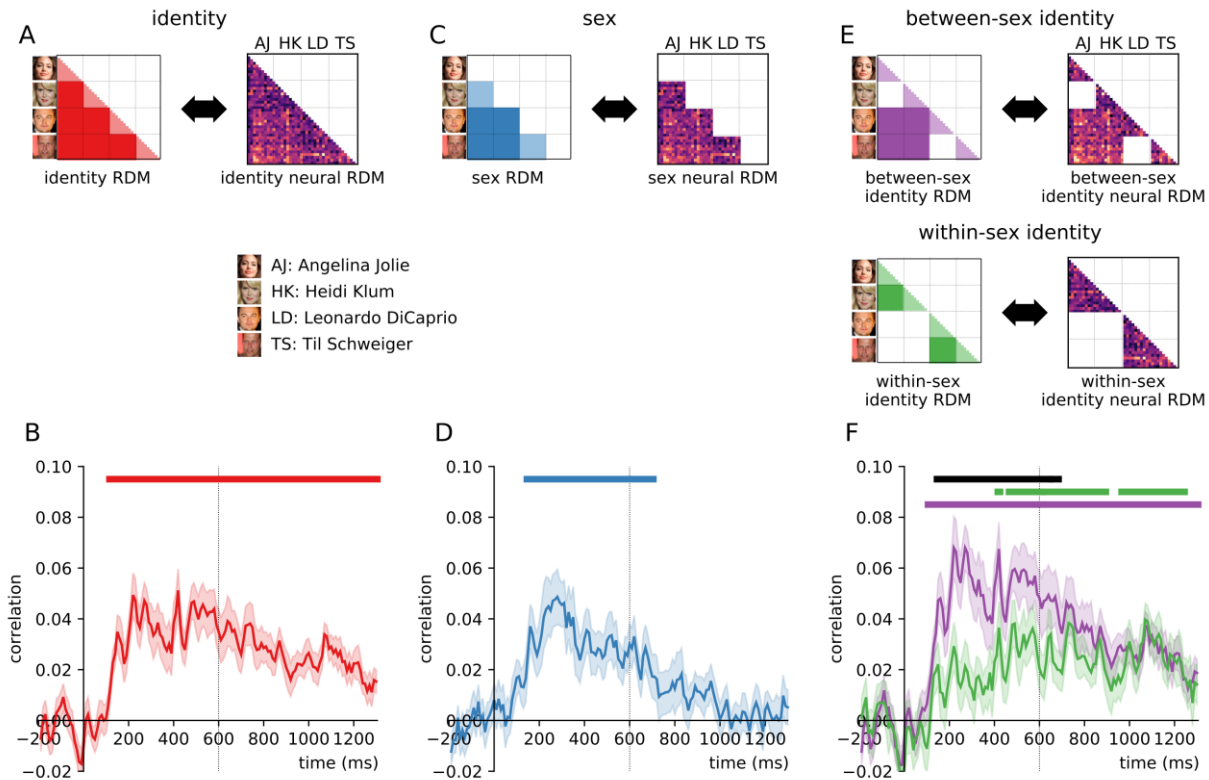

**Figure. 3: RSA Results.** To reveal identity-specific representations, we modeled the representational organization obtained from EEG signals with different predictor matrices (A, C, E). We observed temporally persisting identity information starting from 110ms after stimulus onset (A, B). Similarly, we found strong sex information in the neural organization, emerging between 140ms and 680ms (C, D). Tracking identity information for faces of same and opposite sexes revealed that identity information for same-sex faces was relatively delayed, emerging only after 400ms (E, F). Early identity information was significantly reduced for between-sex comparisons (black significance markers), suggesting that early identity coding partly relies on differences in face sex. Horizontal lines denote statistical significance ( $p < 0.05$ , corrected for multiple comparisons). Shaded ranges denote standard errors of the mean.

272

273 The presence of sex information in the signal suggests that identity information may be

274 processed differently as a function of the sex of the face. Specifically, as faces of the same sex are

275 more similar in various aspects (including their visual appearance), discriminating between the

276 four facial identities may overestimate the amount of genuine identity information in the signal.  
277 We thus split our analysis into comparisons between faces of opposite and of the same sex by  
278 correlating the neural RDMs with two separate predictor RDMs (Fig. 3E).

279 For one of these predictor RDMs (“between-sex”) we only included comparisons between  
280 the two sexes, while for the other RDM (“within-sex”) we only included comparisons within the  
281 same sex. We observed strong identity information for opposite-sex faces that could be retrieved  
282 from as early as 100ms until the end of the epoch and peaking at 260ms (peak  $t[25]=7.40$ ).  
283 Identity information, however, differed when restricting the analysis to within-sex comparisons:  
284 it emerged significantly later, at around 400ms, and peaked at 1,050ms (peak  $t[25]=5.97$ ) (Fig.  
285 3F). When directly comparing identity information for the between- and within-sex comparisons,  
286 we found significantly higher identity information for the between-sex analysis between 140ms  
287 and 660ms. This suggests that early identity representations partly reflect differences in face sex.  
288 By contrast, after 660ms, face sex did not influence identity representations, suggesting the  
289 emergence of identity representations that are invariant to commonalities and differences across  
290 the two sexes.

291  
292 **Face identity information predominantly originates from right posterior sources**  
293 As highlighted by previous neuroimaging studies (Rossion et al., 2003, 2012) (for a recent review  
294 see Yovel, 2016), and evident from our univariate results (see above), face-selective responses  
295 are strongest over right posterior electrodes. Using response patterns across the whole scalp may  
296 therefore partly obscure face identity information in the multivariate analyses. We thus repeated  
297 the RSA separately for each of the six electrode clusters used in the univariate analysis, expecting  
298 the strongest identity information in the right posterior cluster (Fig. 4).

299 For the posterior electrode clusters we found the most pronounced identity information,  
300 and a marked difference between hemispheres. In the left posterior cluster, four-way identity  
301 information (where sex may contribute to identity encoding) emerged from 120ms post-stimulus  
302 onset and peaked at 560ms (peak  $t[25]=4.85$ ) (Fig. 4E). However, restricting the analysis to within-  
303 sex comparisons abolished identity information over this electrode cluster in the signal entirely.  
304 Similarly, in the right posterior cluster (Fig. 4F) we found robust four-way identity information,  
305 starting from 110ms after stimulus onset and peaking at 230ms (peak  $t[25]=4.81$ ). Crucially  
306 however, the right posterior cluster also showed reliable within-sex identity information  
307 throughout the epoch, emerging at the same time, after 110ms and peaking around 530ms (peak  
308  $t[25]=5.40$ ). This result suggests that signals recorded from electrodes close to the typically face-  
309 selective ERP recording sites of the right hemisphere contain widespread identity information,  
310 even when visual and conceptual properties are more robustly controlled for.

311

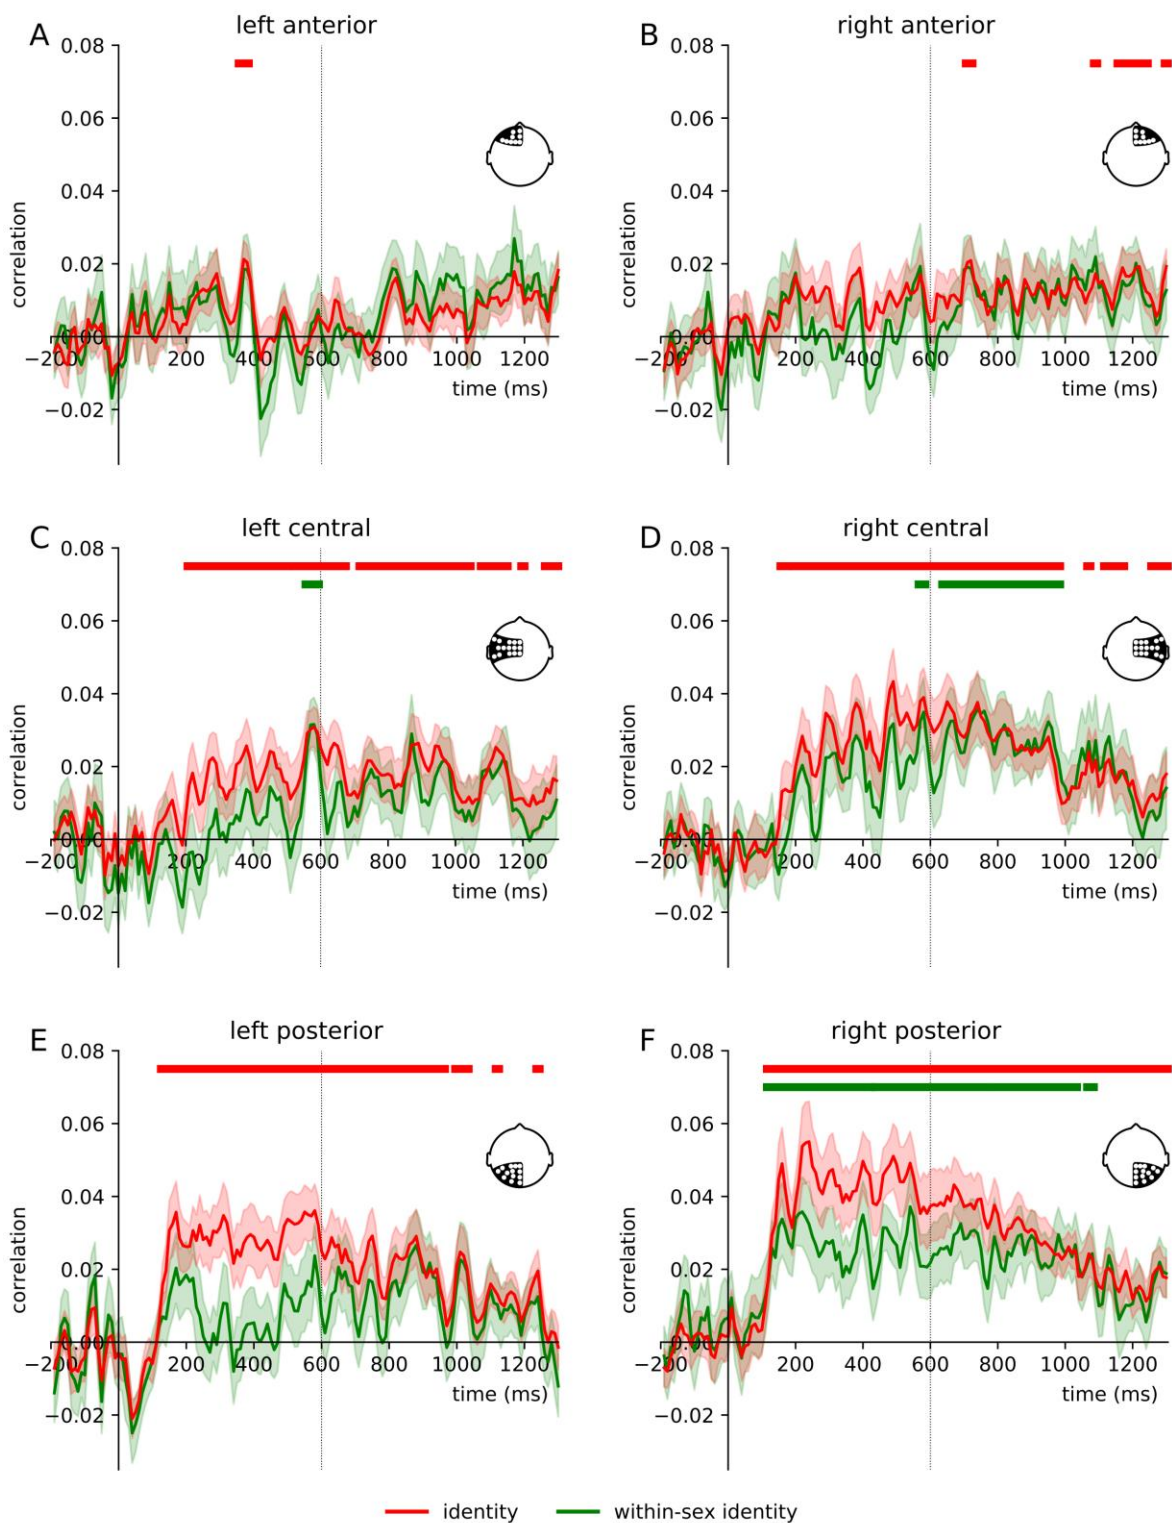

**Figure 4. Sensor-space RSA Results.** When repeating the RSA for the six electrode clusters used in the ERP analysis, we found strongest identity information in the posterior clusters (E/F). This identity information was lateralized to the right hemisphere: In the right central and posterior

electrode clusters (D/F), we observed significant within-sex identity information, with an early onset (110ms) in the right posterior cluster. The corresponding left-hemispheric clusters (C/E) only yielded identity information when also the between-sex comparisons were included. The anterior clusters (A/B) did not yield substantial identity information. Horizontal lines denote statistical significance ( $p < 0.05$ , corrected for multiple comparisons). Shaded ranges denote standard errors of the mean.

312

313           The left central cluster (Fig. 4C) primarily showed four-way identity information, emerging  
314 slightly later as compared to the posterior cluster, after 200ms, peaking at 560ms (peak  
315  $t[25]=5.10$ ). By contrast, the right central cluster not only yielded four-way identity information  
316 (from 150ms, peaking at 480ms, peak  $t[25]=4.97$ ), but also within-sex identity information,  
317 emerging later than that of the posterior cluster, after 550ms and peaking at 1,100ms (peak  
318  $t[25]=3.11$ ).

319           Signals recorded from the two anterior clusters did not yield substantial identity  
320 information (Fig. 4A/B), suggesting that identity information primarily originates from sources in  
321 visual cortex.

322

### 323 [Late representations of face identity are invariant to image properties](#)

324           Our stimulus set was constructed to mirror natural variations across different encounters with a  
325 familiar person. This was achieved by selecting stimuli that ensured a high degree of variability  
326 within each identity (see above), so that image-based stimulus properties are unlikely to account  
327 for the emergence of identity information. To explicitly rule out this possibility, we performed a  
328 control analysis, where we additionally modeled image-based similarities between stimuli. This  
329 was done by constructing pixel RDMs, which reflected the images' dissimilarity in pixel values;

330 these pixel RDMs were partialled out in the subsequent analysis. We focused the control analysis  
331 on the within-sex comparison, which forms the most robust test of face identity representations,  
332 and on the two electrode configurations where it was most robustly found (all electrodes and  
333 right posterior electrodes).

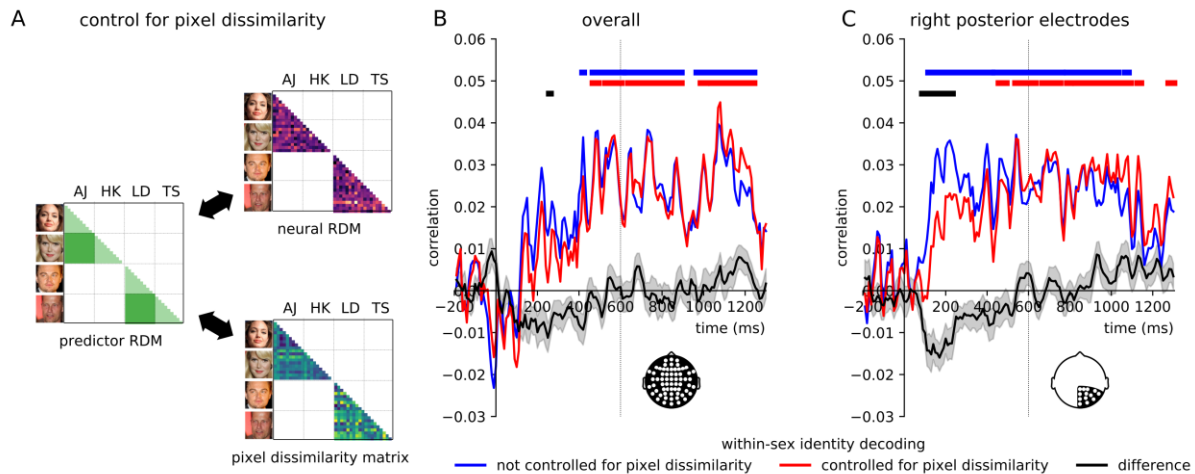

**Figure 5. Controlling for Image Similarity.** In a partial correlation analysis, we tracked within-sex identity information while controlling for the images' pixel dissimilarities (A). When using data from all electrodes, removing pixel dissimilarities did not significantly impact identity information (B). For the right posterior cluster, where early within-sex identity information was found in previous analysis (Fig. 4F), controlling for pixel dissimilarity had a significant impact (C): early identity information (90-230ms) was significantly reduced when controlling for pixel dissimilarity, whereas later identity information was not impacted and remained significant from 460ms after onset. These results suggest that later representations of face identity are invariant to image-based properties. Horizontal lines denote statistical significance ( $p < 0.05$ , corrected for multiple comparisons). Shaded ranges denote standard errors.

334  
335 In the analysis using all electrodes, we found no modulation of identity information after  
336 removing the pixel RDM (Fig. 5B). By contrast, when focusing on the right posterior cluster, we  
337 found a modulation of identity information when controlling for image-based similarity (Fig. 5C).

338 Early within-sex identity information, emerging between 90ms and 230ms was significantly  
339 reduced when controlling for pixel dissimilarity. By contrast, later within-sex identity information  
340 (from 460ms) emerged independently of image-based properties. Together, these results suggest  
341 that later representations of face identity are robust to image-based changes, but genuinely  
342 reflect face identity. These neural representations might thus be a crucial prerequisite for efficient  
343 face recognition across visually different encounters with a person.

344

## 345 [Discussion](#)

346 In the current study, we applied representational similarity analysis to EEG signals to investigate  
347 the neural dynamics of familiar face recognition. Our results show that face identity can be rapidly  
348 recovered from EEG response patterns, even with highly variable, “ambient” face stimuli (Jenkins  
349 et al., 2011). In more fine-grained analyses, we uncovered a gradual emergence of face identity  
350 coding: Early identity information is modulated by face sex and by visual image properties. By  
351 contrast, later identity information, emerging after 400ms and primarily in the right hemisphere,  
352 is unaffected by these factors. This finding suggests that after 400ms representations genuinely  
353 reflect face identity. These later representations may be the basis for real-world face recognition,  
354 allowing the identification of an individual across different encounters and against similar-looking  
355 other faces.

356 In everyday life, the facial appearance of a single person can be highly variable. This  
357 variability makes it challenging to match an individual encounter with a face to an identity  
358 representation stored in memory (Bruce et al., 1999; Clutterbuck and Johnston, 2002; Jenkins et  
359 al., 2011; Andrews et al., 2015). The invariant identity representations revealed here are ideal for  
360 extracting face identity from different encounters, as they discriminate identities of the same sex,



361 across variations in visual properties. The late emergence of such representations is compatible  
362 with the involvement of conceptual identity representations in the medial and anterior temporal  
363 cortices (Quiroga et al., 2005; Mormann et al., 2008); linking our EEG results with functional  
364 neuroimaging data (Cichy et al., 2014, 2016) could directly test this possibility in the future.

365         How do these seemingly late identity representations support rapid face recognition in  
366 the wild? While these representations are useful under great variability and in the presence of  
367 distracting face information, face recognition is sometimes easier than this: In real-life situations,  
368 we often know which person to expect, which visual properties are diagnostic of him or her, and  
369 where the person likely shows up. Under such conditions, motor responses in face recognition  
370 tasks can be faster than 400ms (Besson et al., 2017). This observation suggests that face identity  
371 can sometimes be inferred from earlier representations that do not need to be highly invariant.  
372 Future studies could thus test whether different representational stages are crucial for face  
373 recognition under varying demands.

374         Our study revealed a pronounced right-hemispheric lateralization of identity information:  
375 face identity information was strongest in electrodes over the right, as opposed to the left, visual  
376 cortex. Specifically, only signals recorded over right occipito-temporal cortex contained identity  
377 information which is invariant to both face sex and image-based properties. This right-lateralized  
378 topography is consistent with sources in the visual face processing network that has a strong right-  
379 hemispheric lateralization (Axelrod and Yovel, 2015; Yovel, 2016). Interestingly, neuroimaging  
380 work showed that specifically right-hemispheric activations predict behavioral performance in  
381 familiar face recognition (Weibert and Andrews, 2015), suggesting that these identity  
382 representations could play an important role in face recognition. However, this notion has to be



383 explicitly tested in the future, as caution needs to be applied when inferring cortical sources from  
384 EEG scalp topographies.

385 Besides identity coding, our findings also offer insights into the cortical coding of face sex.  
386 As our stimulus set contained faces of opposite sexes, we could also track the emergence of sex  
387 information. Face sex can be rapidly retrieved from EEG signals, both in univariate and  
388 multivariate analyses, and predicts cortical organization from 140ms. This finding corroborates  
389 previous ERP studies, which have suggested that face sex is extracted early and affects a variety  
390 of face-related ERP components (Mouchetant-Rostaing et al., 2000; Ito and Urland, 2003, 2005;  
391 Kloth et al., 2015). As opposed to the temporally sustained identity information, sex information  
392 displayed a more transient nature, and vanished shortly before 700ms after onset. This difference  
393 between identity and sex information suggests that the two properties are coded somewhat  
394 independently at later processing stages.

395 In conclusion, we provide a characterization of the neural dynamics underlying familiar  
396 face recognition. Representations of face identity emerged gradually across the visual processing  
397 cascade. Invariant identity representations were observed after 400ms of processing. We suggest  
398 that these representations are crucial for face recognition across different encounters with a  
399 person.

400

## 401 References

- 402 Andrews S, Jenkins R, Cursiter H, Burton AM, Andrews S, Jenkins R, Cursiter H, Telling AMB, Andrews S,  
403 Jenkins R, Cursiter H, Burton AM (2015) Telling faces together : Learning new faces through  
404 exposure to multiple instances Telling faces together : Learning new faces through exposure to  
405 multiple instances. *Q J Exp Psychol* 0218:2041–2050 Available at:  
406 <https://www.ncbi.nlm.nih.gov/pubmed/25607814>.
- 407 Anzellotti S, Caramazza A (2014) The neural mechanisms for the recognition of face identity in humans.  
408 *Front Psychol* 5:672 Available at: <https://www.ncbi.nlm.nih.gov/pmc/articles/PMC4072087/>.
- 409 Anzellotti S, Fairhall SL, Caramazza A (2014) Decoding representations of face identity that are tolerant  
410 to rotation. *Cereb Cortex* 24:1988–1995 Available at: [https://academic.oup.com/cercor/article-](https://academic.oup.com/cercor/article-lookup/doi/10.1093/cercor/bht046)  
411 [lookup/doi/10.1093/cercor/bht046](https://academic.oup.com/cercor/article-lookup/doi/10.1093/cercor/bht046).
- 412 Axelrod V, Yovel G (2015) Successful decoding of famous faces in the fusiform face area. *PLoS One*  
413 10:e0117126 Available at:  
414 <http://journals.plos.org/plosone/article?id=10.1371/journal.pone.0117126>.
- 415 Bentin S, Deouell LY (2000) Structural Encoding and Identification in Face Processing: Erp Evidence for  
416 Separate Mechanisms. *Cogn Neuropsychol* 17:35–55 Available at:  
417 <http://www.tandfonline.com/doi/abs/10.1080/026432900380472>.
- 418 Besson G, Barragan-Jason G, Thorpe SJ, Fabre-Thorpe M, Puma S, Ceccaldi M, Barbeau EJ (2017) From  
419 face processing to face recognition: Comparing three different processing levels. *Cognition* 158:33–  
420 43 Available at: <http://www.sciencedirect.com/science/article/pii/S0010027716302384>.
- 421 Bruce V, Henderson Z, Greenwood K, Hancock PJB, Burton AM, Miller P (1999) Verification of face  
422 identities from images captured on video. *J Exp Psychol Appl* 5:339–360 Available at:  
423 <http://psycnet.apa.org/fulltext/1999-01801-001.html>.
- 424 Caharel S, Jiang F, Blanz V, Rossion B (2009) Recognizing an individual face: 3D shape contributes earlier

- 425 than 2D surface reflectance information. *Neuroimage* 47:1809–1818 Available at:
- 426 <https://www.ncbi.nlm.nih.gov/pubmed/19497375>.
- 427 Cichy RM, Kriegeskorte N, Jozwik KM, Bosch JJF van den, Charest I (2017) Neural dynamics of real-world
- 428 object vision that guide behaviour. *bioRxiv*:147298 Available at:
- 429 <https://www.biorxiv.org/content/early/2017/06/08/147298>.
- 430 Cichy RM, Pantazis D, Oliva A (2014) Resolving human object recognition in space and time. *Nat Neurosci*
- 431 17:455–462 Available at: <https://www.nature.com/articles/nn.3635>.
- 432 Cichy RM, Pantazis D, Oliva A (2016) Similarity-Based Fusion of MEG and fMRI Reveals Spatio-Temporal
- 433 Dynamics in Human Cortex During Visual Object Recognition. *Cereb Cortex* 26:3563–3579 Available
- 434 at: <https://academic.oup.com/cercor/article/26/8/3563/2428700>.
- 435 Clutterbuck R, Johnston RA (2002) Exploring levels of face familiarity by using an indirect face-matching
- 436 measure. *Perception* 31:985–994 Available at: <https://www.ncbi.nlm.nih.gov/pubmed/12269591>.
- 437 Curran T, Hancock J (2007) The FN400 indexes familiarity-based recognition of faces. *Neuroimage*
- 438 36:464–471 Available at: <https://www.sciencedirect.com/science/article/pii/S1053811906011839>.
- 439 Debruille JB, Guillem F, Renault B (1998) ERPs and chronometry of face recognition: following-up Seeck
- 440 et al. and George et al. *Neuroreport* 9:3349–3353 Available at:
- 441 <http://www.ncbi.nlm.nih.gov/pubmed/9855278> [Accessed July 7, 2018].
- 442 Duchaine B, Yovel G (2015) A Revised Neural Framework for Face Processing. *Annu Rev Vis Sci* 1:393–416
- 443 Available at: <http://www.annualreviews.org/doi/10.1146/annurev-vision-082114-035518>.
- 444 Freeman JB, Ambady N, Holcomb PJ (2010) The face-sensitive N170 encodes social category information.
- 445 *Neuroreport* Available at: <https://www.ncbi.nlm.nih.gov/pmc/articles/PMC3576572>.
- 446 Gilaie-Dotan S, Malach R (2007) Sub-exemplar shape tuning in human face-related areas. *Cereb Cortex*
- 447 17:325–338 Available at: [https://academic.oup.com/cercor/article-](https://academic.oup.com/cercor/article-pdf/17/2/325/17297436/bhj150.pdf)
- 448 [pdf/17/2/325/17297436/bhj150.pdf](https://academic.oup.com/cercor/article-pdf/17/2/325/17297436/bhj150.pdf).
- 449 Gobbini MI, Haxby J V. (2007) Neural systems for recognition of familiar faces. *Neuropsychologia* 45:32–

- 450 41 Available at: <https://www.ncbi.nlm.nih.gov/pubmed/16797608>.
- 451 Goesaert E, Op de Beeck HP (2013) Representations of Facial Identity Information in the Ventral Visual  
452 Stream Investigated with Multivoxel Pattern Analyses. *J Neurosci* 33:8549–8558 Available at:  
453 <http://www.jneurosci.org/cgi/doi/10.1523/JNEUROSCI.1829-12.2013>.
- 454 Gosling A, Eimer M (2011) An event-related brain potential study of explicit face recognition.  
455 *Neuropsychologia* 49:2736–2745.
- 456 Gramfort A, Luessi M, Larson E, Engemann DA, Strohmeier D, Brodbeck C, Goj R, Jas M, Brooks T,  
457 Parkkonen L, Hämäläinen M (2013) MEG and EEG data analysis with MNE-Python. *Front Neurosci*  
458 Available at: <https://www.frontiersin.org/articles/10.3389/fnins.2013.00267/full>.
- 459 Gramfort A, Luessi M, Larson E, Engemann DA, Strohmeier D, Brodbeck C, Parkkonen L, Hämäläinen MS  
460 (2014) MNE software for processing MEG and EEG data. *Neuroimage* 86:446–460 Available at:  
461 <https://www.ncbi.nlm.nih.gov/pubmed/24161808>.
- 462 Groen IIA, Greene MR, Baldassano C, Fei-Fei L, Beck DM, Baker CI (2018) Distinct contributions of  
463 functional and deep neural network features to representational similarity of scenes in human  
464 brain and behavior. *Elife* 7 Available at: <https://elifesciences.org/articles/32962>.
- 465 Grootswagers T, Wardle SG, Carlson TA (2017) Decoding dynamic brain patterns from evoked responses:  
466 A tutorial on multivariate pattern analysis applied to time series neuroimaging data. *J Cogn*  
467 *Neurosci* 29:677–697 Available at:  
468 [https://www.mitpressjournals.org/doi/abs/10.1162/jocn\\_a\\_01068](https://www.mitpressjournals.org/doi/abs/10.1162/jocn_a_01068).
- 469 Heisz JJ, Watter S, Shedden JM (2006) Automatic face identity encoding at the N170. *Vision Res* 46:4604–  
470 4614 Available at: <https://www.sciencedirect.com/science/article/pii/S0042698906004573>.
- 471 Huddy V, Schweinberger SR, Jentsch I, Burton AM (2003) Matching faces for semantic information and  
472 names: an event-related brain potentials study. *Cogn Brain Res* 17:314–326 Available at:  
473 <https://www.sciencedirect.com/science/article/pii/S0926641003001319> [Accessed July 7, 2018].
- 474 Ito TA, Urland GR (2003) Race and Gender on the Brain: Electrocortical Measures of Attention to the

- 475 Race and Gender of Multiply Categorizable Individuals. *J Pers Soc Psychol* 85:616–626 Available at:  
476 <https://www.ncbi.nlm.nih.gov/pubmed/14561116>.
- 477 Ito TA, Urland GR (2005) The influence of processing objectives on the perception of faces: An ERP study  
478 of race and gender perception. *Cogn Affect Behav Neurosci* 5:21–36 Available at:  
479 <https://www.ncbi.nlm.nih.gov/pubmed/15913005>.
- 480 Jas M, Engemann DA, Bekhti Y, Raimondo F, Gramfort A (2017) Autoreject: Automated artifact rejection  
481 for MEG and EEG data. *Neuroimage* 159:417–429 Available at:  
482 <https://doi.org/10.1016/j.neuroimage.2017.06.030>.
- 483 Jenkins R, White D, Van Montfort X, Mike Burton A (2011) Variability in photos of the same face.  
484 *Cognition* 121:313–323 Available at: <https://www.ncbi.nlm.nih.gov/pubmed/21890124>.
- 485 Jin J, Allison BZ, Kaufmann T, Kübler A, Zhang Y, Wang X, Cichocki A (2012) The Changing Face of P300  
486 BCIs: A Comparison of Stimulus Changes in a P300 BCI Involving Faces, Emotion, and Movement  
487 Frishman L, ed. *PLoS One* 7:e49688 Available at: <http://dx.plos.org/10.1371/journal.pone.0049688>  
488 [Accessed July 7, 2018].
- 489 Johnston R a, Edmonds AJ (2009) Familiar and unfamiliar face recognition: a review. *Memory* 17:577–596  
490 Available at: <http://www.ncbi.nlm.nih.gov/pubmed/19548173>.
- 491 Kaiser D, Oosterhof NN, Peelen M V. (2016) The Neural Dynamics of Attentional Selection in Natural  
492 Scenes. *J Neurosci* 36:10522–10528 Available at:  
493 <http://www.jneurosci.org/cgi/doi/10.1523/JNEUROSCI.1385-16.2016>.
- 494 Kloth N, Damm M, Schweinberger SR, Wiese H (2015) Aging affects sex categorization of male and  
495 female faces in opposite ways. *Acta Psychol (Amst)* 158:78–86 Available at:  
496 <https://www.sciencedirect.com/science/article/pii/S0001691815000931> [Accessed July 7, 2018].
- 497 Kramer RSS, Young AW, Burton AM (2018) Understanding face familiarity. *Cognition* 172:46–58 Available  
498 at: <https://www.ncbi.nlm.nih.gov/pubmed/29232594>.
- 499 Kriegeskorte N (2008) Representational similarity analysis – connecting the branches of systems

500 neuroscience. *Front Syst Neurosci* 2:4 Available at:  
501 <http://journal.frontiersin.org/article/10.3389/neuro.06.004.2008/abstract> [Accessed July 7, 2018].  
502 Kriegeskorte N, Formisano E, Sorger B, Goebel R (2007) Individual faces elicit distinct response patterns  
503 in human anterior temporal cortex. *Proc Natl Acad Sci* 104:20600–20605 Available at:  
504 <http://www.pnas.org/cgi/doi/10.1073/pnas.0705654104>.  
505 Kriegeskorte N, Kievit RA (2013) Representational geometry: Integrating cognition, computation, and the  
506 brain. *Trends Cogn Sci* 17:401–412 Available at:  
507 <https://www.ncbi.nlm.nih.gov/pmc/articles/PMC3730178/>.  
508 Liu J, Harris A, Kanwisher N (2013) Stages of processing in face perception: An MEG study. *Soc Neurosci*  
509 Key Readings 5:75–86 Available at: <http://www.nature.com/articles/nn909> [Accessed July 7, 2018].  
510 Mike Burton A (2013) Why has research in face recognition progressed so slowly? The importance of  
511 variability. *Q J Exp Psychol* 66:1467–1485 Available at:  
512 <http://www.ncbi.nlm.nih.gov/pubmed/23742022>.  
513 Mormann F, Kornblith S, Quiroga RQ, Kraskov A, Cerf M, Fried I, Koch C (2008) Latency and Selectivity of  
514 Single Neurons Indicate Hierarchical Processing in the Human Medial Temporal Lobe. *J Neurosci*  
515 28:8865–8872 Available at: <http://www.jneurosci.org/cgi/doi/10.1523/JNEUROSCI.1640-08.2008>.  
516 Mouchetant-Rostaing Y, Giard MH, Bentin S, Aguera PE, Pernier J (2000) Neurophysiological correlates of  
517 face gender processing in humans. *Eur J Neurosci*.  
518 Nasr S, Tootell RBH (2012) Role of fusiform and anterior temporal cortical areas in facial recognition.  
519 *Neuroimage* 63:1743–1753 Available at: <https://www.ncbi.nlm.nih.gov/pubmed/23034518>.  
520 Natu V, O’Toole AJ (2011) The neural processing of familiar and unfamiliar faces: A review and synopsis.  
521 Wiley/Blackwell (10.1111). Available at: <http://doi.wiley.com/10.1111/j.2044-8295.2011.02053.x>  
522 [Accessed July 7, 2018].  
523 Nemrodov D, Niemeier M, Mok JNY, Nestor A (2016) The time course of individual face recognition: A  
524 pattern analysis of ERP signals. *Neuroimage* 132:469–476 Available at:

- 525 <http://linkinghub.elsevier.com/retrieve/pii/S1053811916002020> [Accessed July 7, 2018].
- 526 Nemrodov D, Niemeier M, Patel A, Nestor A (2018) The Neural Dynamics of Facial Identity Processing:  
527 insights from EEG-Based Pattern Analysis and Image Reconstruction. *eneuro*:ENEURO.0358-17.2018  
528 Available at: <http://eneuro.sfn.org/lookup/doi/10.1523/ENEURO.0358-17.2018> [Accessed July 7,  
529 2018].
- 530 Nestor A, Plaut DC, Behrmann M (2011) Unraveling the distributed neural code of facial identity through  
531 spatiotemporal pattern analysis. *Proc Natl Acad Sci* 108:9998–10003 Available at:  
532 <http://www.pnas.org/cgi/doi/10.1073/pnas.1102433108>.
- 533 O'Toole AJ, Deffenbacher KA, Valentin D, McKee K, Huff D, Abdi H (1998) The perception of face gender:  
534 The role of stimulus structure in recognition and classification. *Mem Cogn* 26:146–160 Available at:  
535 <https://www.ncbi.nlm.nih.gov/pubmed/9519705>.
- 536 Oosterhof NN, Connolly AC, Haxby J V. (2016) CoSMoMMPA: Multi-Modal Multivariate Pattern Analysis of  
537 Neuroimaging Data in Matlab/GNU Octave. *Front Neuroinform* 10:27 Available at:  
538 <http://journal.frontiersin.org/Article/10.3389/fninf.2016.00027/abstract> [Accessed July 7, 2018].
- 539 Peirce JW (2008) Generating stimuli for neuroscience using PsychoPy. *Front Neuroinform* 2 Available at:  
540 <http://journal.frontiersin.org/article/10.3389/neuro.11.010.2008/abstract>.
- 541 Quiroga RQ, Reddy L, Kreiman G, Koch C, Fried I (2005) Invariant visual representation by single neurons  
542 in the human brain. *Nature* 435:1102–1107 Available at:  
543 <https://www.nature.com/articles/nature03687>.
- 544 Rossion B, Hanseeuw B, Dricot L (2012) Defining face perception areas in the human brain: A large-scale  
545 factorial fMRI face localizer analysis. *Brain Cogn* 79:138–157 Available at:  
546 <https://www.ncbi.nlm.nih.gov/pubmed/22330606>.
- 547 Rossion B, Jacques C (2008) Does physical interstimulus variance account for early electrophysiological  
548 face sensitive responses in the human brain? Ten lessons on the N170. *Neuroimage* 39:1959–1979  
549 Available at: <https://www.ncbi.nlm.nih.gov/pubmed/18055223>.

- 550 Rossion B, Joyce CA, Cottrell GW, Tarr MJ (2003) Early lateralization and orientation tuning for face,  
551 word, and object processing in the visual cortex. *Neuroimage* 20:1609–1624 Available at:  
552 <https://www.ncbi.nlm.nih.gov/pubmed/14642472>.
- 553 Rousselet GA, Husk JS, Pernet CR, Gaspar CM, Bennett PJ, Sekuler AB (2009) Age-related delay in  
554 information accrual for faces: Evidence from a parametric, single-trial EEG approach. *BMC Neurosci*  
555 10:114 Available at: <http://bmcneurosci.biomedcentral.com/articles/10.1186/1471-2202-10-114>  
556 [Accessed July 7, 2018].
- 557 Schweinberger SR, Pickering EC, Jentsch I, Burton AM, Kaufmann JM (2002) Event-related brain  
558 potential evidence for a response of inferior temporal cortex to familiar face repetitions. *Cogn Brain*  
559 *Res* 14:398–409 Available at: <https://www.ncbi.nlm.nih.gov/pubmed/12421663>.
- 560 Smith SM, Nichols TE (2009) Threshold-free cluster enhancement: Addressing problems of smoothing,  
561 threshold dependence and localisation in cluster inference. *Neuroimage* 44:83–98 Available at:  
562 <https://www.ncbi.nlm.nih.gov/pubmed/18501637>.
- 563 Tanaka JW, Curran T, Porterfield AL, Collins D (2006) Activation of Preexisting and Acquired Face  
564 Representations: The N250 Event-related Potential as an Index of Face Familiarity. *J Cogn Neurosci*  
565 18:1488–1497 Available at: <http://www.mitpressjournals.org/doi/10.1162/jocn.2006.18.9.1488>  
566 [Accessed July 7, 2018].
- 567 Verosky SC, Todorov A, Turk-Browne NB (2013) Representations of individuals in ventral temporal cortex  
568 defined by faces and biographies. *Neuropsychologia* 51:2100–2108 Available at:  
569 <https://www.ncbi.nlm.nih.gov/pubmed/23871881>.
- 570 Vida MD, Nestor A, Plaut DC, Behrmann M (2017) Spatiotemporal dynamics of similarity-based neural  
571 representations of facial identity. *Proc Natl Acad Sci* 114:388–393 Available at:  
572 <http://www.pnas.org/lookup/doi/10.1073/pnas.1614763114> [Accessed July 7, 2018].
- 573 Visconti Di Oleggio Castello M, Halchenko YO, Guntupalli JS, Gors JD, Gobbini MI (2017) The neural  
574 representation of personally familiar and unfamiliar faces in the distributed system for face



575 perception. *Sci Rep* 7:12237 Available at: <http://www.nature.com/articles/s41598-017-12559-1>  
576 [Accessed July 7, 2018].

577 Wang Z, Bovik AC, Sheikh HR, Simoncelli EP (2004) Image quality assessment: From error visibility to  
578 structural similarity. *IEEE Trans Image Process* 13:600–612 Available at:  
579 <https://ieeexplore.ieee.org/document/1284395>.

580 Weibert K, Andrews TJ (2015) Activity in the right fusiform face area predicts the behavioural advantage  
581 for the perception of familiar faces. *Neuropsychologia* 75:588–596 Available at:  
582 <https://www.ncbi.nlm.nih.gov/pubmed/26187507>.

583 Weibert K, Harris RJ, Mitchell A, Byrne H, Young AW, Andrews TJ (2016) An image-invariant neural  
584 response to familiar faces in the human medial temporal lobe. *Cortex* 84:34–42 Available at:  
585 <https://www.ncbi.nlm.nih.gov/pubmed/27697662>.

586 Young AW, Burton AM (2017) Recognizing Faces. *Curr Dir Psychol Sci* 26:212–217 Available at:  
587 [journals.sagepub.com/doi/abs/10.1177/0963721416688114](http://journals.sagepub.com/doi/abs/10.1177/0963721416688114).

588 Yovel G (2016) Neural and cognitive face-selective markers: An integrative review. *Neuropsychologia*  
589 83:5–13 Available at: <https://www.ncbi.nlm.nih.gov/pubmed/26407899>.

590

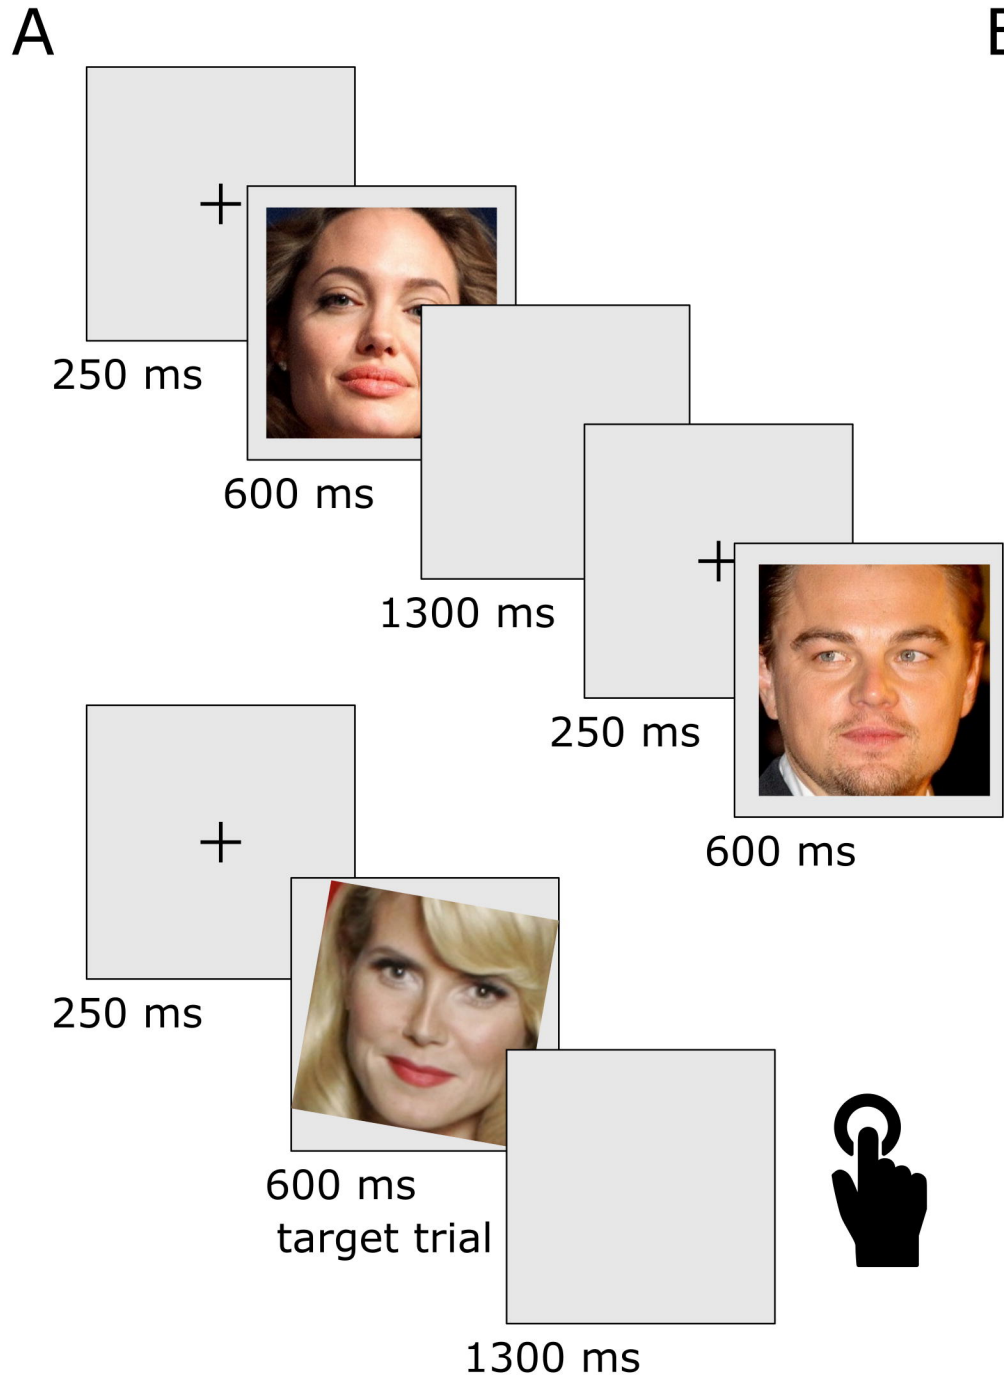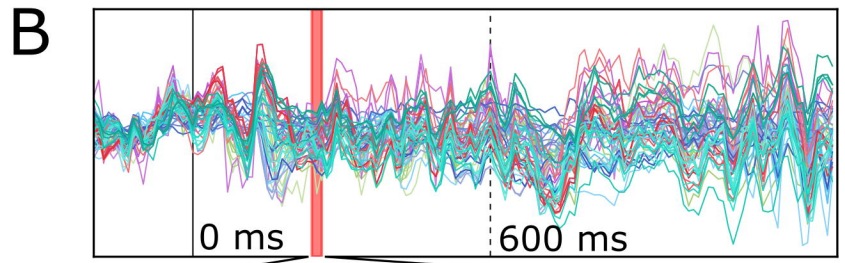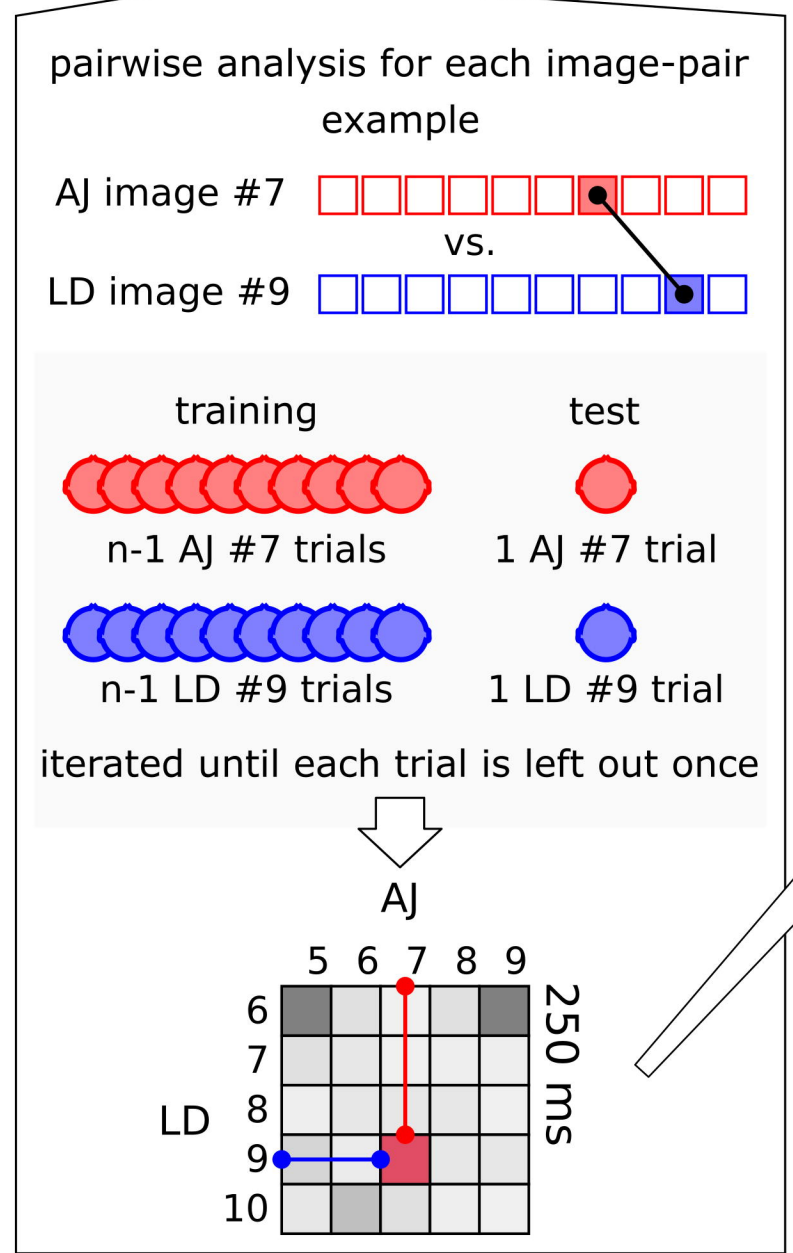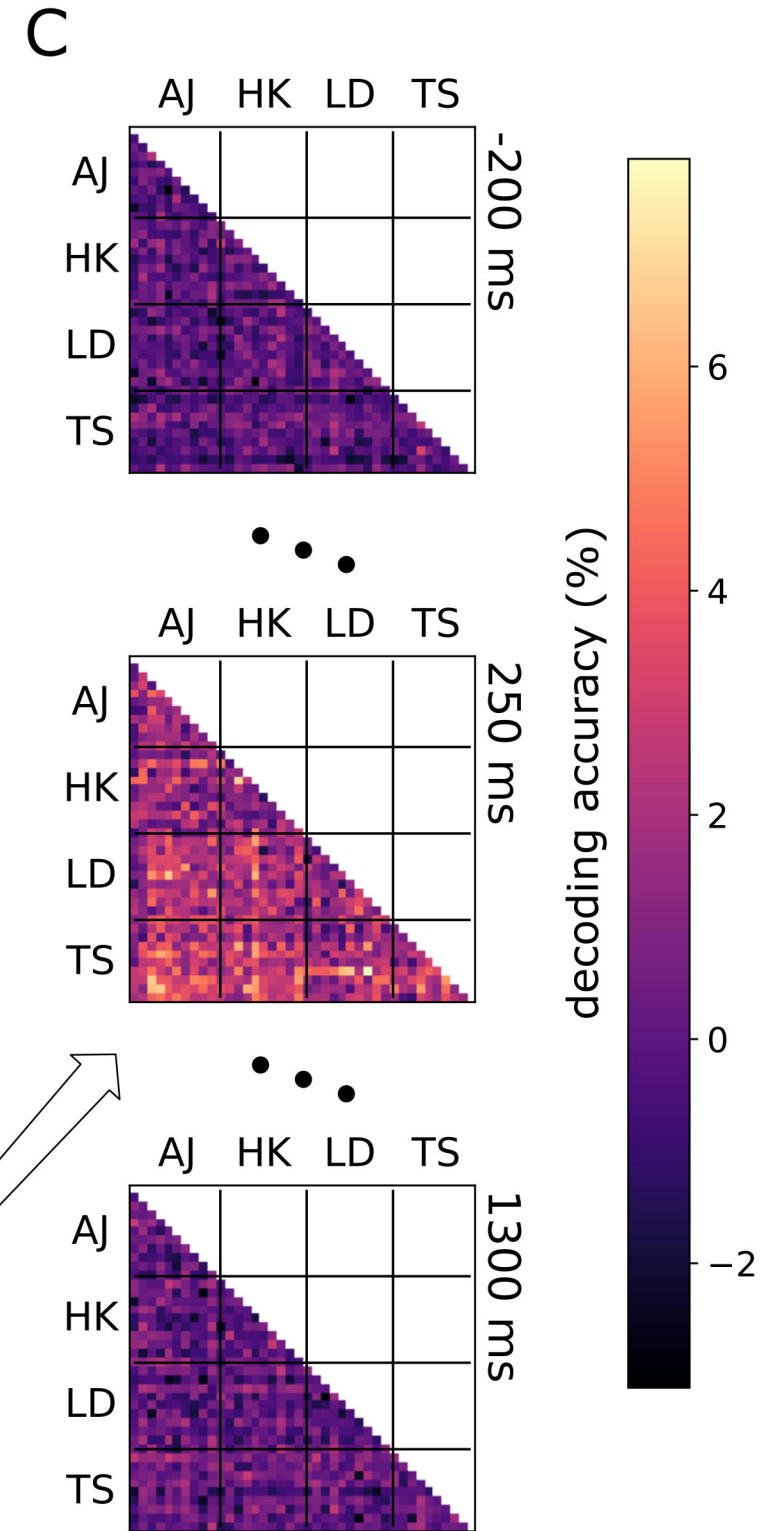

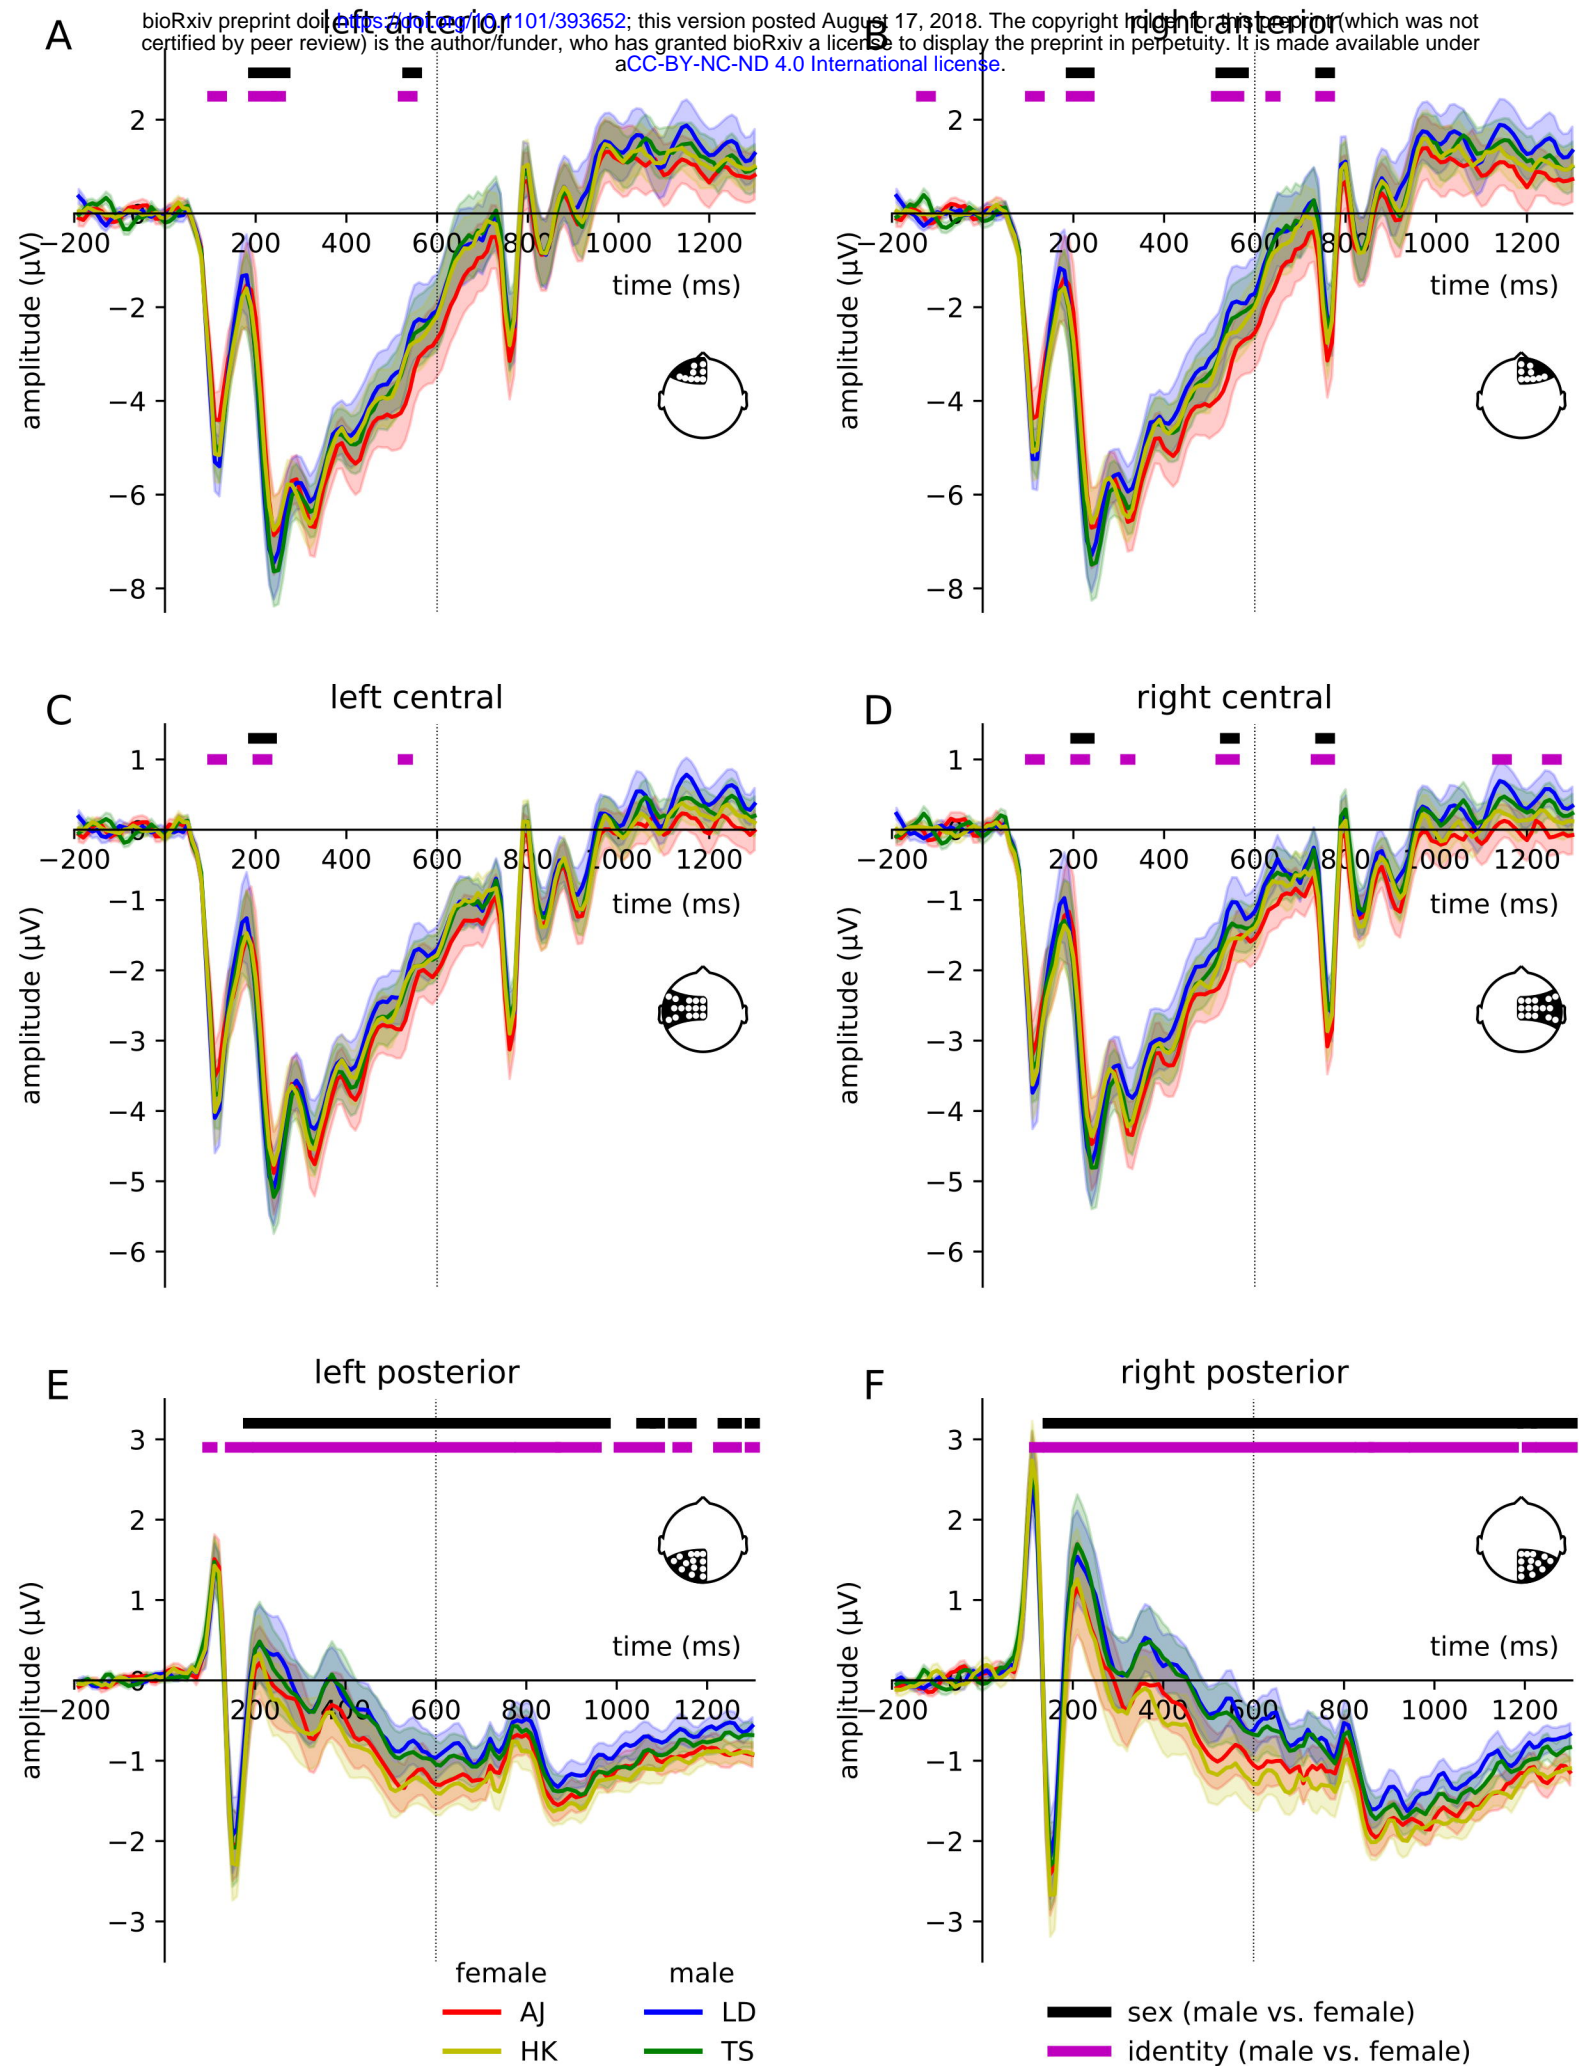

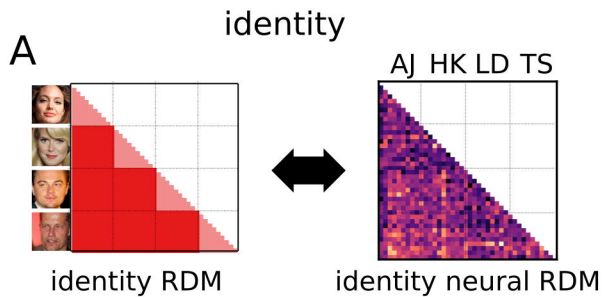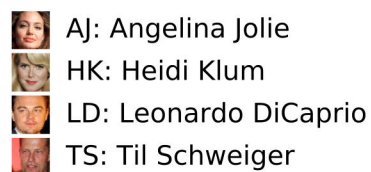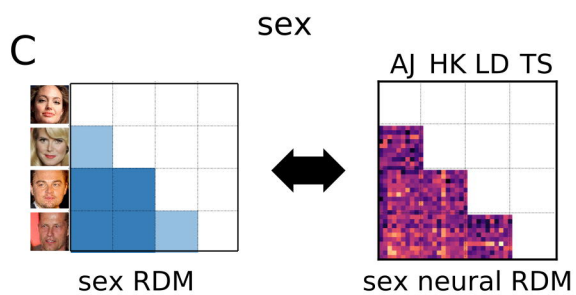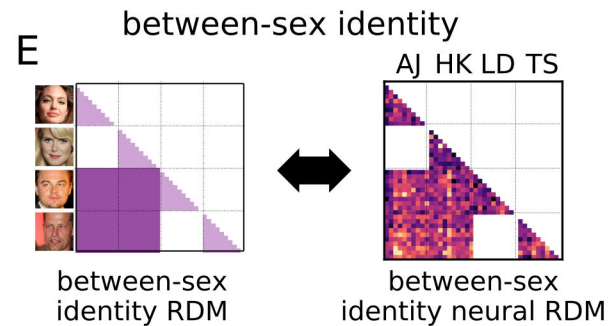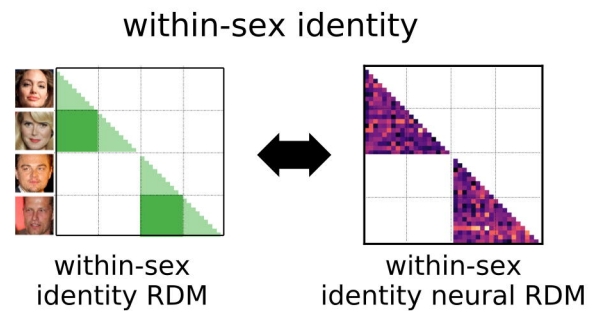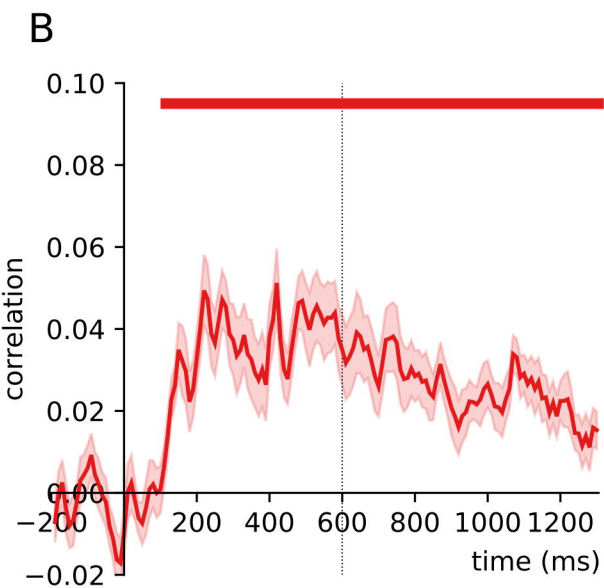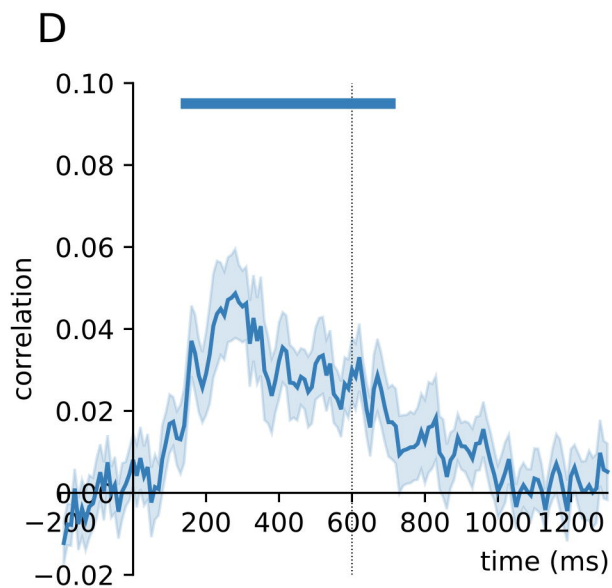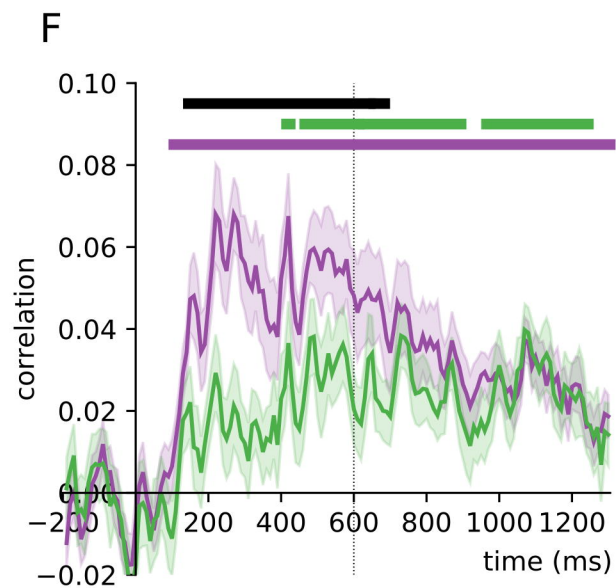



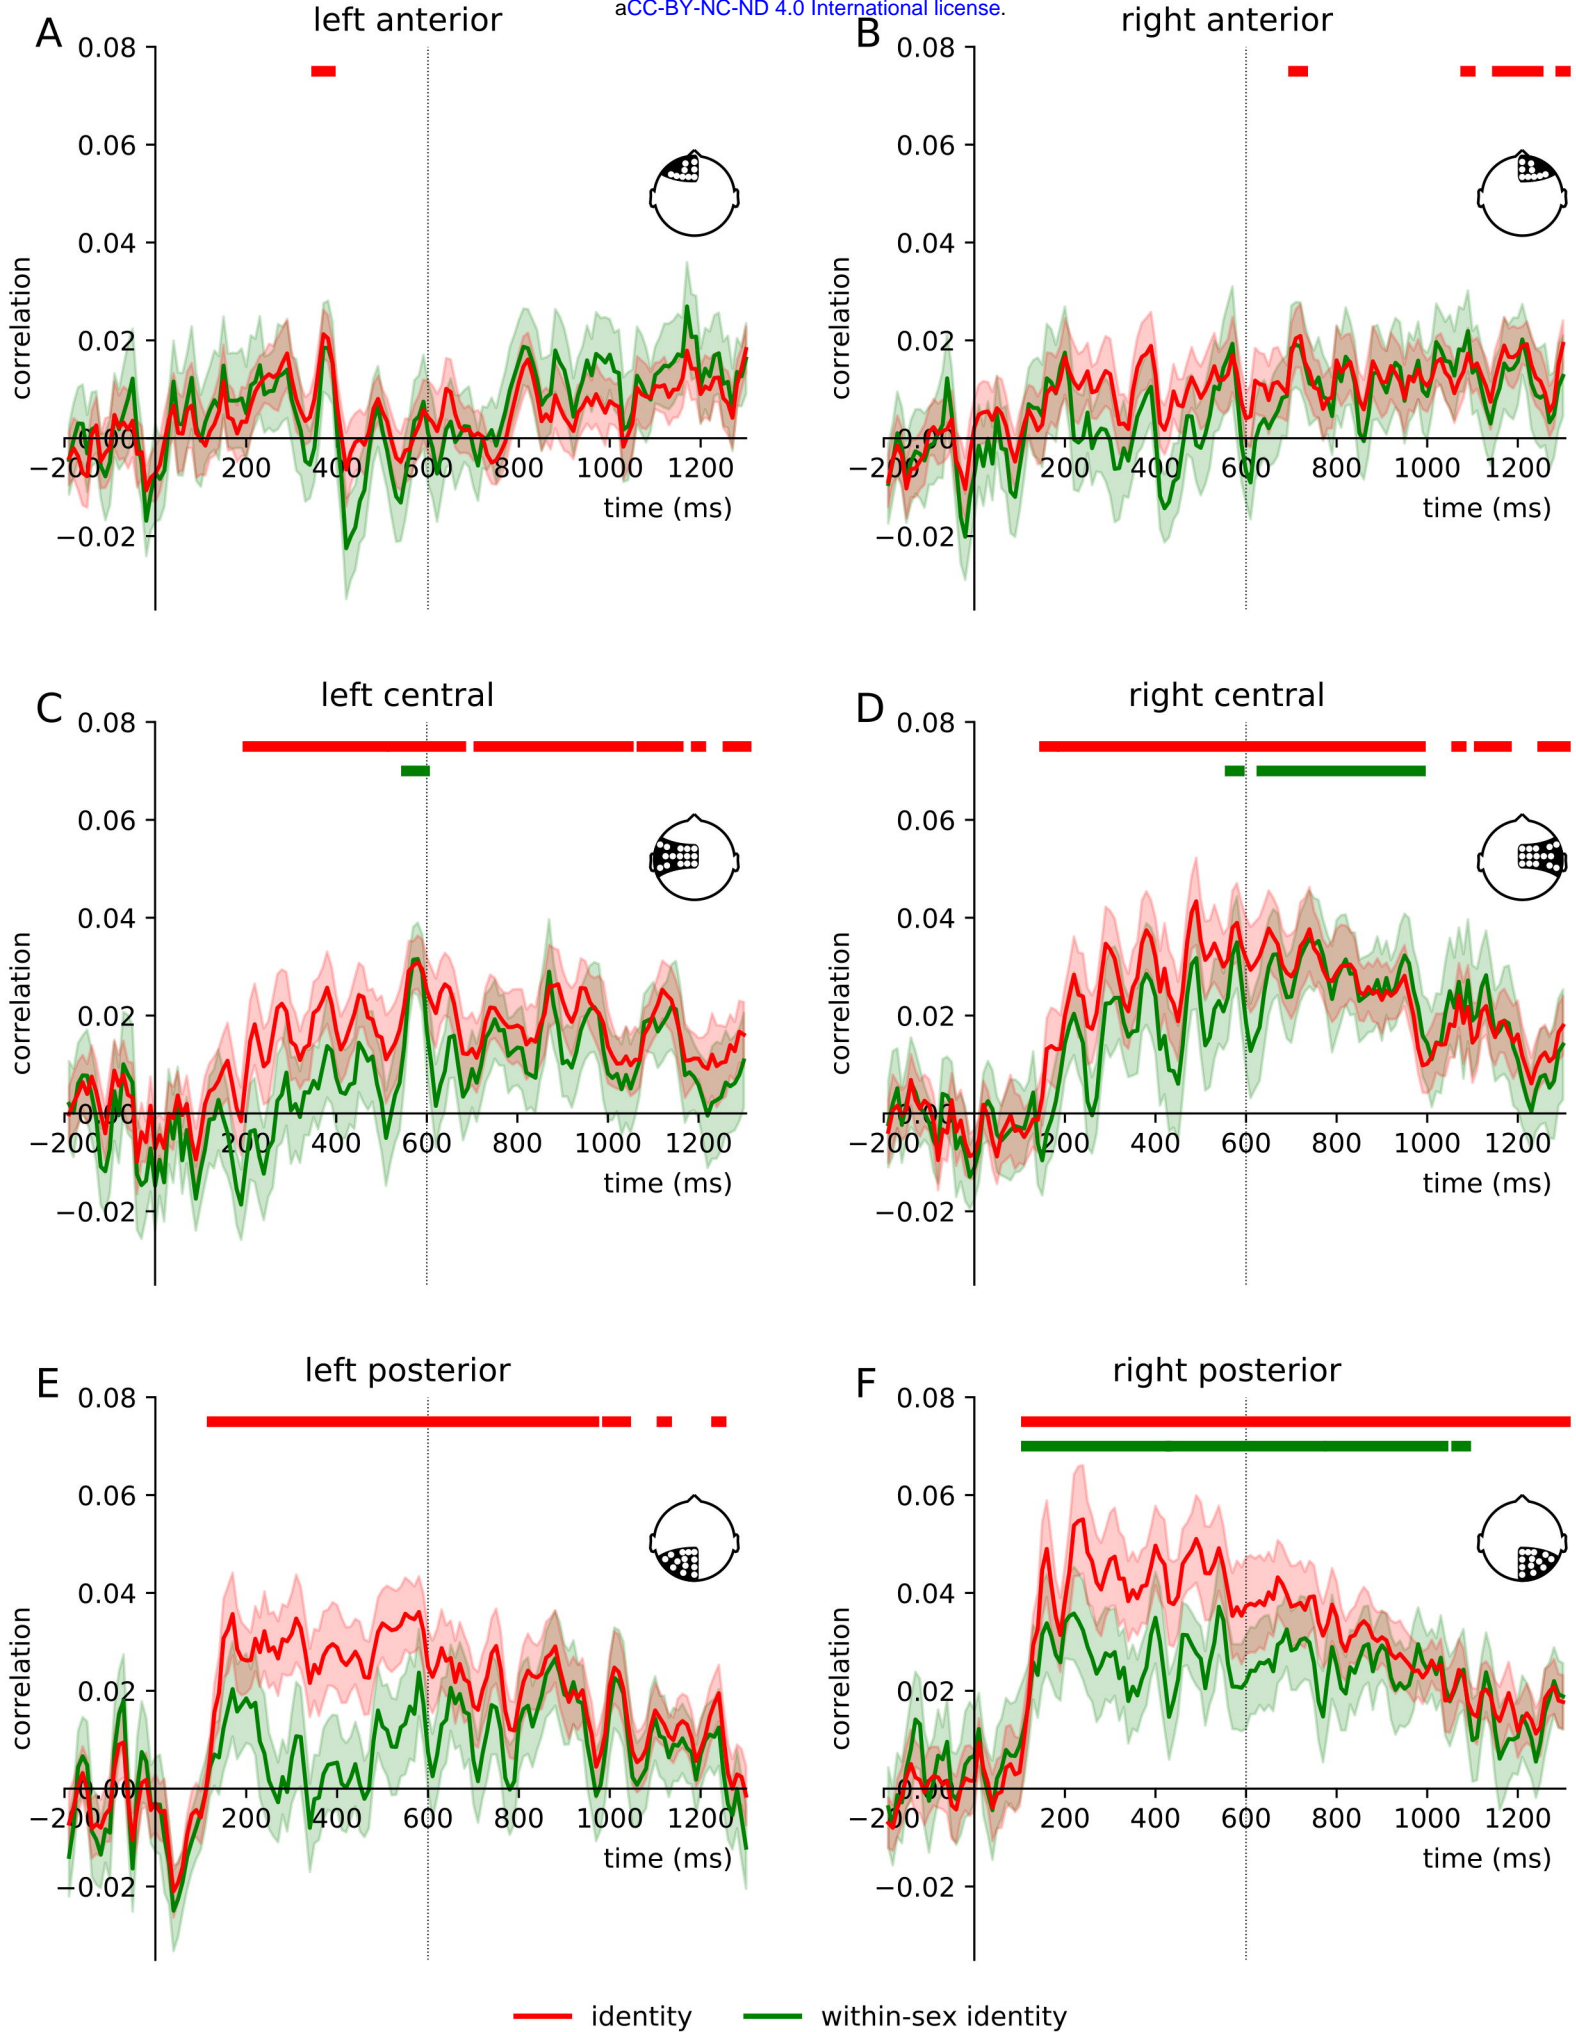

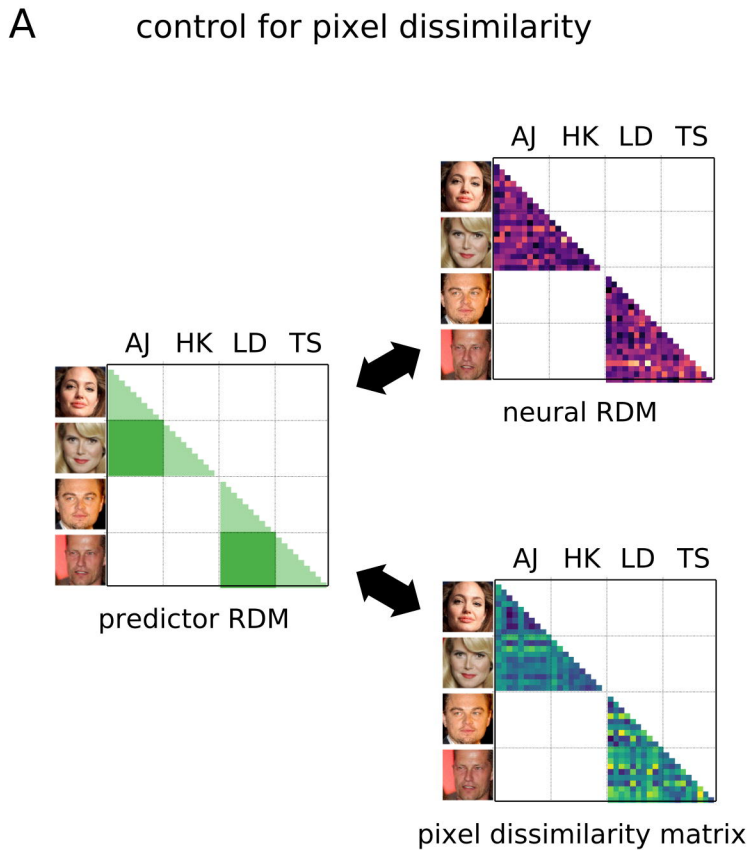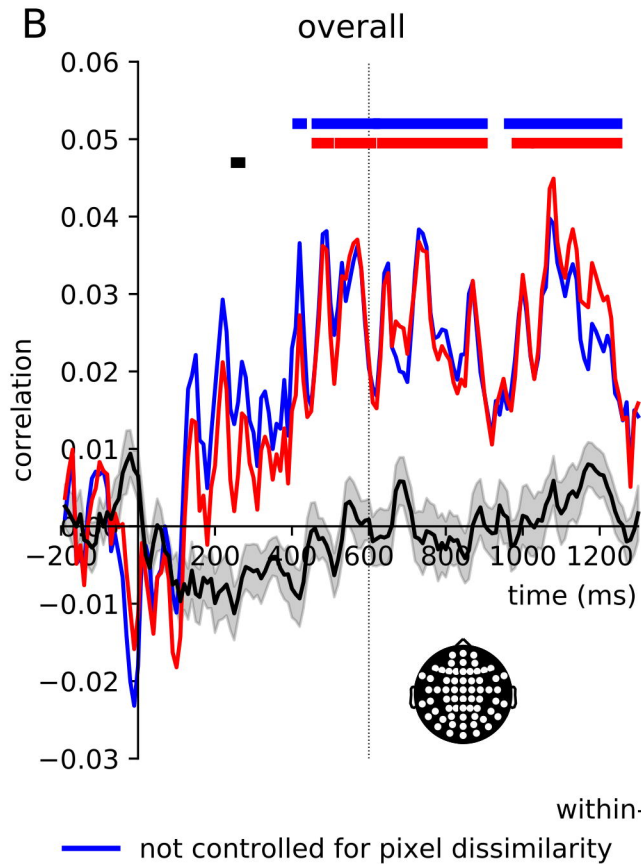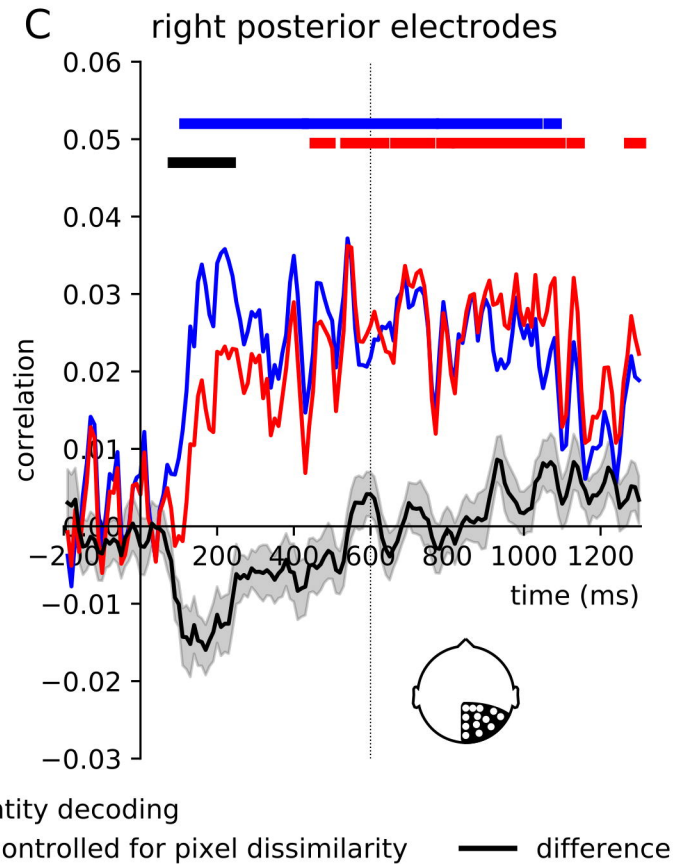

Source: https://www.biorxiv.org/content/10.1101/393652v1.full.pdf
